# Supplementary material for: Reduction in sympathetic tone in patients with obstructive sleep apnoea: is fixed CPAP more effective than APAP? A randomised, parallel trial protocol
Source: PubMed Central journal article supplement — BMJ Open. 2019 Apr 4;9(4):e024253. doi: 10.1136/bmjopen-2018-024253 (PMC6500296; doi:10.1136/bmjopen-2018-024253), 2019-04-04
Supplement: bmjopen-2018-024253.draft_revisions.pdf [file bmjopen-2018-024253.draft_revisions.pdf]

# BMJ Open

BMJ Open is committed to open peer review. As part of this commitment we make the peer review history of every article we publish publicly available.

When an article is published we post the peer reviewers' comments and the authors' responses online. We also post the versions of the paper that were used during peer review. These are the versions that the peer review comments apply to.

The versions of the paper that follow are the versions that were submitted during the peer review process. They are not the versions of record or the final published versions. They should not be cited or distributed as the published version of this manuscript.

BMJ Open is an open access journal and the full, final, typeset and author-corrected version of record of the manuscript is available on our site with no access controls, subscription charges or pay-per-view fees (<http://bmjopen.bmj.com>).

If you have any questions on BMJ Open's open peer review process please email [editorial.bmjopen@bmj.com](mailto:editorial.bmjopen@bmj.com)

# BMJ Open

## Reduction in sympathetic tone in Obstructive sleep apnea patients: is fixed CPAP more effective than APAP? – a randomized, parallel trial protocol

|                               |                                                                                                                                                                                                                                                                                                                                                                                                                                                                                                                                                          |
|-------------------------------|----------------------------------------------------------------------------------------------------------------------------------------------------------------------------------------------------------------------------------------------------------------------------------------------------------------------------------------------------------------------------------------------------------------------------------------------------------------------------------------------------------------------------------------------------------|
| Journal:                      | <i>BMJ Open</i>                                                                                                                                                                                                                                                                                                                                                                                                                                                                                                                                          |
| Manuscript ID                 | bmjopen-2018-024253                                                                                                                                                                                                                                                                                                                                                                                                                                                                                                                                      |
| Article Type:                 | Protocol                                                                                                                                                                                                                                                                                                                                                                                                                                                                                                                                                 |
| Date Submitted by the Author: | 18-May-2018                                                                                                                                                                                                                                                                                                                                                                                                                                                                                                                                              |
| Complete List of Authors:     | Treptow, Erika; 1. Université Grenoble Alpes, Pepin, Jean; Hôpital Universitaire de Grenoble, Bailly , Sebastien; Centre Hospitalier Universitaire Grenoble Alpes Hopital Michallon<br>Levy, P; Hypoxia Pathophysiology (HP2) Laboratory Joseph Fourier University<br>Bosc , Cecile ; Centre Santé et Sommeil<br>Destors, Marie; Centre Hospitalier Universitaire Grenoble Alpes Hopital Michallon<br>Woehrle, Holger; Lung Center Ulm<br>Tamisier, Renaud; Univ. Grenoble Alpes, HP2; Inserm, U1042; Grenoble Alps University Hospital, EFCR Laboratory |
| Keywords:                     | obstructive sleep apnea, Hypertension < CARDIOLOGY, continous positive airway pressure, SLEEP MEDICINE, sympathetic activity                                                                                                                                                                                                                                                                                                                                                                                                                             |
|                               |                                                                                                                                                                                                                                                                                                                                                                                                                                                                                                                                                          |

SCHOLARONE™  
Manuscripts

1  
2  
3  
4 1 **Reduction in sympathetic tone in Obstructive sleep apnea patients:**  
5  
6 2 **is fixed CPAP more effective than APAP? – a randomized, parallel**  
7  
8 **trial protocol**  
9

10  
11 4 **Erika Treptow<sup>1</sup>, Jean-Louis Pépin<sup>1</sup>, Sebastien Bailly<sup>1</sup>, Patrick Levy<sup>1</sup>, Cecile Bosc<sup>2</sup>, Marie**  
12  
13 5 **Destors<sup>1</sup>, Holger Woehrle<sup>3</sup>, Renaud Tamsier<sup>1</sup>**  
14  
15 6

- 16  
17 7 1. University Grenoble Alpes, HP2 laboratory; Inserm U1042, Grenoble, France and  
18 8 Grenoble Alpes University Hospital, EFCR Laboratory, Thorax and Vessels Division,  
19 9 Grenoble, France.  
20  
21  
22 10 2. Health and Sleep Center, Grenoble, France.  
23  
24 11 3. Sleep and Ventilation Center Blaubeuren / Ulm Lung Center, Ulm, Germany  
25

26 12 **Sponsor:** Grenoble Alpes University Hospital

27  
28 13 CS 10217, 38043 Grenoble Cedex 09 France  
29

30 14 **Corresponding authors:** Renaud Tamsier and Erika Treptow

31  
32 15 EFCR Laboratory, Grenoble Alpes University Hospital

33  
34 16 CS 10217 Grenoble 38043 Cedex 09 France  
35

36 17 e-mail: [rtamsier@chu-grenoble.fr](mailto:rtamsier@chu-grenoble.fr); [EXT-Etreptow@chu-grenoble.fr](mailto:EXT-Etreptow@chu-grenoble.fr)  
37

38  
39 18 Phone: +33 (0)4 76765516  
40

41 19 Sources of support: ET is supported by the *Coordenação de Aperfeiçoamento de Pessoal de*  
42 20 *Nível Superior* (CAPES) – Brazil. This work was supported by unrestricted grants from  
43 21 ResMed, foundation *Agir pour les maladies chroniques* and by the French National Research  
44 22 Agency in the framework of the "Investissements d'avenir" program (ANR-15-IDEX-02).  
45  
46  
47  
48

49 23 Word count: 2994  
50

51 24 Number of figures and tables: 2 figure and 2 tables  
52  
53  
54  
55  
56  
57  
58  
59  
60

1  
2  
3 1  
4  
5 2 **Abbreviations:**  
6

7 3 ABPM: ambulatory BP monitoring  
8

9 4 AHI: apnea and hypopnea index  
10

11 5 APAP: auto-adjusting continuous pressure  
12

13 6 BP: blood pressure  
14

15 7 CPAP: continuous positive airway pressure  
16

17 8 DBP: diastolic blood pressure  
18

19 9 ECG: electrocardiography  
20

21 10 EEG: electroencephalography  
22

23 11 EMG: electromyography  
24

25 12 EOG: electrooculography  
26

27 13 HRV: heart rate variability  
28

29 14 ITT: intention-to-treat analysis  
30

31 15 MBP: mean blood pressure  
32

33 16 MSNA: muscle sympathetic nerve activity  
34

35 17 OSA: obstructive sleep apnea  
36

37 18 PPT: per protocol analysis  
38

39 19 SBP: systolic blood pressure  
40

41 20  
42

43 21  
44

45 22  
46

47 23  
48

49 24  
50

51 25  
52

53 26  
54

55 27  
56

57 28  
58

**Abstract (Word count: 288)**

*Introduction:* Obstructive sleep apnea (OSA) is a prevalent chronic disease associated with fatal and non-fatal cardiovascular events. Hypertension is one of the major intermediary mechanisms leading to late cardiovascular events. Intermittent hypoxia and hypercapnia associated with nocturnal acute respiratory events stimulate chemo- reflexes which in turn result in sympathetic over-activity and finally blood pressure elevation. Continuous positive airway pressure (CPAP) is the primary treatment for OSA and induces a small but significant reduction in blood pressure. The use of auto-adjusting continuous pressure (APAP) modalities has increased in the last few years and several studies have suggested different ranges of blood pressure (BP) reduction when comparing fixed CPAP versus APAP. However, the pathophysiological mechanisms implicated are not fully elucidated. The variations in pressure through the night inherent to APAP use may induce persistent respiratory efforts and sleep fragmentation that might impair sympathovagal balance during sleep and result in smaller decreases in BP. Therefore, this study aims to compare muscle sympathetic nerve activity (MSNA) assessed by microneurography (the reference method for measuring sympathetic activity) after one month of APAP versus fixed CPAP in treatment-naive OSA patients.

*Methods and analysis:* adult subjects with newly diagnosed OSA (apnea hypopnea index > 20/h) will be randomized for treatment with APAP or fixed CPAP. Measurements of sympathetic activity by MSNA, heart rate variability and catecholamines will be obtained at baseline and after one month of treatment. The primary composite outcome will be the change in sympathetic tone measured by MSNA in bursts/min and bursts/100 heart beats.

*Ethics and dissemination:* The protocol was approved by the Ethics Committee (*Comite de Protection des Personnes Sud Est V*) and was registered on ClinicalTrials.gov (NCT03428516). The study started in March 2018 with primary completion expected in March 2019.

Trial registration number: NCT03428516

*Keywords:* obstructive sleep apnea, hypertension, continuous positive airway pressure, sleep medicine, sympathetic activity.

1  
2  
3 1 *Strengths and limitations of the study:*  
4

- 5 2 • The analysis of vascular and cardiac sympathetic activity will be evaluated by  
6 3 complementary methods: microneurography of the peroneal nerve (the gold  
7 4 standard method), heart rate variability (HRV) and urinary catecholamines.  
8 5 • The use of 24h ambulatory blood pressure (BP) monitoring is more sensitive when  
9 6 assessing therapeutic interventions than office BP and provides prognostic guidance.  
10 7 • Subjects will be randomly allocated to one of the two positive airway pressure (PAP)  
11 8 modalities by a statistician not involved in the data collection. All other investigators,  
12 9 patients and assessment technicians will be blinded to the patient's group.  
13 10 • The same make and model of CPAP device will be used both in Fixed and APAP  
14 11 modes.  
15 12 • The duration of exposure to treatment of one month is ample but might under-  
16 13 represent the chronic effects of PAP therapies on sympathetic activity.  
17  
18  
19  
20  
21  
22  
23  
24  
25  
26  
27  
28  
29  
30  
31  
32  
33  
34  
35  
36  
37  
38  
39  
40  
41  
42  
43  
44  
45  
46  
47  
48  
49  
50  
51  
52  
53  
54  
55  
56  
57  
58  
59  
60

## **Introduction**

Obstructive sleep apnea (OSA) is associated with increased cardiovascular morbidity and mortality (1-6). Hypertension is a leading cause of death worldwide and the main factor implicated in cardiovascular risk (7-9). There is a dose-response relationship between indices of OSA severity and hypertension (10, 11). Accordingly, one of the most common objectives when treating OSA is blood pressure (BP) reduction in order to prevent or reduce late cardiovascular events.

Obstructive sleep apnea (OSA) is characterized by partial (hypopnea) or complete (apnea) upper airway collapses during sleep (12). Sympathetic activation is the main intermediary mechanism for BP elevation in OSA patients (11, 13). The repetitive occurrence of respiratory events leading to intermittent hypoxia and hypercapnia results in stimulation of central and peripheral chemoreflexes enhancing sympathetic activity and, subsequently increasing vascular tone and promoting blood pressure elevation (14). Chronic sympathetic activation induces vascular remodeling and, frequently, uncontrolled or resistant hypertension (15). In OSA patients, night-time sympathetic over-activation is associated with the non-dipping pattern of BP and the high sympathetic tone persists during wakefulness (16). In the early course of the disease, even non-hypertensive subjects exhibit increased BP and muscle sympathetic nerve activity in response to chronic intermittent hypoxia (13, 17).

Continuous positive airway pressure remains the gold standard therapeutic option for the treatment of severe OSA. Several systematic reviews and meta-analyses (18-24) have demonstrated limited but significant improvements in BP (a reduction of about 2 mmHg in 24-h mean BP). Better results are achieved in specific phenotypes with more severe OSA, higher BP at baseline and adherent to PAP therapies (use of CPAP  $\geq$  4 hours/night) (19, 25-27).

Auto-adjusting CPAP (APAP) changes the pressure delivered throughout the night depending on events detected, with the goal of applying the minimal effective pressure (28-31) thus reducing side effects and improving adherence. The average overnight applied pressure is significantly lower with APAP for the same range of improvement in the apnea-hypopnea index (AHI) (32). However, the continuous variations in pressure associated with the functioning of APAP devices potentially induce micro-arousals, and change sleep

1  
2  
3 1 macrostructure in some patients (31,33,34). This might limit the decrease in sympathetic  
4 2 activity during the night when treating OSA and consequently result in a smaller reduction of  
5 3 BP.  
6  
7

8  
9 4 Studies have demonstrated controversial results on the impact of the two pressure  
10 5 modalities (fixed versus auto-adjusting) on blood pressure reduction (table 2). Although  
11 6 some authors reported superiority with fixed pressure (35, 36), other clinical trials reported  
12 7 no significant difference between APAP and CPAP (37-39). A recent study that evaluated 208  
13 8 patients with a longer than usual follow up of 2 years demonstrated comparable reductions  
14 9 in sleepiness and blood pressure with similar OSA-related costs for both treatments (37).  
15 10 Karasulu *et al* (40) and Patrino *et al* (41) have demonstrated lower reduction in cardiac  
16 11 sympathetic activity using heart rate variability (HRV) in OSA patients and obese OSA  
17 12 patients during APAP treatment compared with fixed CPAP. However, neither study was  
18 13 randomized and Patrino evaluated only a specific population of obese patients with severe  
19 14 OSA, which limits the generalizability of the results. In a small study of adult males, without  
20 15 antihypertensive treatment, Marrone *et al* (34), evaluated BP changes after treatment with  
21 16 APAP versus CPAP. As a secondary outcome, they reported sympathetic activity by  
22 17 measurement of catecholamines. Norepinephrine decreased significantly after treatment in  
23 18 the APAP group but not in the CPAP group and normetanephrine decreased significantly in  
24 19 both groups. Overall, there is a lack of well-designed studies evaluating the mechanisms  
25 20 underlying specific BP responses under APAP versus fixed CPAP. In this context, the aim of  
26 21 the present study is to compare vascular sympathetic tone after one month of treatment  
27 22 with fixed versus auto-adjusting pressure by microneurography in newly diagnosed OSA  
28 23 patients.  
29  
30  
31  
32  
33  
34  
35  
36  
37  
38  
39  
40  
41  
42  
43

## 44 24 **Methods and analysis**

### 45 25 Study design

46  
47  
48  
49 26 This study is a prospective, single-site, randomized, double-blind, parallel, one  
50 27 month-controlled trial.  
51  
52

### 53 28 Objectives

#### 54 29 Primary research objective

55  
56  
57  
58  
59  
60



1  
2  
3 1 The main objective is to compare change in vascular sympathetic tone measured by  
4 2 Muscle Sympathetic Nerve Activity (MSNA) microneurography after one month of APAP  
5 3 versus after one month of fixed CPAP in treatment-naive moderate to severe OSA patients.  
6  
7

8  
9 4 The primary composite outcome will be the change in sympathetic tone measured by  
10 5 MSNA in bursts/min and bursts/100 heart beats between baseline and after one month of  
11 6 treatment.  
12  
13

#### 14 7 *Secondary research objectives*

15  
16  
17 8 The secondary objectives will be to compare the following variables before and after  
18 9 treatment:  
19

20  
21 10 - Ambulatory BP monitoring (24h ABPM): mean blood pressure (MBP), systolic blood  
22 11 pressure (SBP) and diastolic blood pressure DBP, during 24h periods as well as daytime and  
23 12 night-time measurements.  
24

25  
26  
27 13 - Urinary catecholamines (24h collection): epinephrine, norepinephrine, and dopamine.  
28

29  
30 14 - Heart Rate Variability as an indicator of cardiac sympathovagal balance.  
31

#### 32 15 Population

33  
34  
35 16 Consecutive adult outpatients attending a tertiary hospital sleep center (*Grenoble*  
36 17 *Alpes University Hospital – France*), with an established diagnosis of obstructive sleep apnea  
37 18 by full-night polysomnography (apnea-hypopnea index > 20/hour), and willing to receive  
38 19 positive airway pressure treatment, will be enrolled in the study. The inclusion and exclusion  
39 20 criteria are presented in table 1. Written informed consent will be obtained from all  
40 21 participants by a sleep physician study investigator (supplementary file).  
41  
42  
43  
44  
45

#### 46 22 *Materials*

#### 47 48 23 Muscle Sympathetic Nerve Activity (MSNA)

49  
50  
51 24 Multiunit postganglionic muscle sympathetic activity will be recorded from the  
52 25 peroneal nerve (Figure 1). A reference electrode and a collecting electrode will be inserted  
53 26 percutaneously to record the discharges of the muscle sympathetic fibres contained in the  
54 27 peroneal nerve. Dorsiflexion of the first toe will confirm the correct placement of the  
55  
56  
57  
58  
59  
60

1  
2  
3 1 electrode. Neural activity will be amplified, band-pass filtered, rectified and integrated to  
4 2 create a sympathetic neurogram for real-time inspection. The raw, unfiltered neurogram will  
5 3 be recorded at 40 kHz for processing using our algorithm for identification of sympathetic  
6 4 nerve signals (42). All signals will be digitized and stored (Windaq, DATAQ Instruments, or  
7 5 PowerLab, ADInstruments) for subsequent analysis.

11  
12 6 MSNA will be expressed as burst frequency ( $\text{bursts}\cdot\text{min}^{-1}$ ) and burst frequency  
13 7 normalized to heart beat (bursts per 100 beats).

16 8 During the measurement of MSNA, a standard 3-lead electrocardiogram will  
17 9 continuously record heart rate. Beat-by-beat arterial BP will be non-invasively measured  
18 10 throughout the study session via finger photoplethysmography (CNAP 500, CNSystems,  
19 11 Austria) and calibrated against oscillometric brachial pressure.

#### 24 12 Blood flow

26 13 Popliteal blood velocity will be recorded using a 4-MHz Doppler probe (Multidop T2,  
27 14 DWL) at the popliteal fossa of the contralateral leg to the sympathetic nerve recording.

31 15 Several parameters will be extracted from the above measurements: sympathetic  
32 16 vascular tone, blood pressure and blood flow. Furthermore, we shall calculate vascular  
33 17 resistance and vascular sympathetic tone and blood pressure gains, as previously described  
34 18 (14, 43).

#### 38 19 Blood Pressure

41 20 Ambulatory BP monitoring (ABPM) will use Spacelabs 90207<sup>®</sup> devices (Spacelabs  
42 21 International, Redmond, Washington, USA). The measurements will be made using an  
43 22 oscillometric method and programmed every 15 minutes during the day and every 30  
44 23 minutes at night. The following ABPM parameters will be studied: mean SBP, mean DBP and  
45 24 mean HR over 24 hours, the same mean values during the daytime (7.00 am to 10.00 pm)  
46 25 and at night-time (10.00 pm to 7.00 am). The normal night-time physiological dipping BP is  
47 26 expected to be > 10%. The summary values in the ABPM report for each patient will be used  
48 27 in the data analysis. This is an average by subject and by recording session (at baseline and 1  
49 28 month). Data relating to the average daytime and night-time systolic BP (SBP), diastolic BP  
50 29 (DBP), and mean BP (MBP) will be recorded. SBP values of > 260 mmHg or < 70 mmHg and

1  
2  
3 1 DBP > 150 mmHg or < 40 mmHg will be automatically eliminated. Daytime hypertension is  
4 2 defined as daytime SBP > 135 mmHg and/or DBP > 85 mmHg, and night-time hypertension  
5 3 as SBP > 120 mmHg and/or DBP > 70 mmHg.  
6  
7

8  
9 4 Clinical BPs (SBP and DBP) will be measured by mercury sphygmomanometer on  
10 5 three occasions in line with the European Society of Hypertension–European Society of  
11 6 Cardiology and American College of Cardiology/ American Heart Association guidelines (9,  
12 7 44). Mean arterial BP (MABP) will be calculated as  $DBP + 1/3(SBP-DBP)$ .  
13  
14  
15

16 8 Each recording will be validated only if the following quality criteria are met: cuff size  
17 9 adapted to the diameter of the arm, calibration of the device, full 24 hours' duration of  
18 10 recording comprising at least 48 valid measures and no more than two missing time slots.  
19  
20  
21

### 22 11 Catecholamine measurements

23  
24  
25 12 24h urine samples will be collected, acidified with acetic acid and stored at -20°C until  
26 13 analysis. Catecholamines (epinephrine, norepinephrine, and dopamine) will be measured in  
27 14 one millilitre of urine by high-performance liquid chromatography with electrochemical  
28 15 detection (Coularray Detector, ESA Dionex, Chelmsford, USA).  
29  
30  
31

### 32 16 Polysomnography

33  
34  
35 17 Full night polysomnography will be performed at our sleep laboratory. The following  
36 18 physiological variables will be monitored: electroencephalography (EEG), electrooculography  
37 19 (EOG), electromyography (EMG), electrocardiography (ECG), oral and nasal airflows, chest  
38 20 and abdominal respiratory effort through inductance plethysmography, snoring, body  
39 21 position, oxyhemoglobin saturation by pulse oximetry and heart rate. Continuous recordings  
40 22 will be taken with electrode positions C3/A2-C4/A1-Cz/01 of the international 10–20  
41 23 Electrode Placement System, along with eye movements, chin electromyogram and ECG  
42 24 with a modified V2 lead. Airflow will be measured with nasal pressure prongs together with  
43 25 the sum of oral and nasal thermistor signals. Respiratory effort will be monitored using  
44 26 abdominal and thoracic bands. Oxygen saturation will be measured using a pulse oximeter.  
45 27 Respiratory events will be classified according to the American Academy of Sleep Medicine's  
46 28 guidelines (45). An apnea is defined as the complete cessation of airflow for at least 10  
47 29 seconds and hypopnea as a reduction of at least 30% in the nasal pressure signal associated  
48  
49  
50  
51  
52  
53  
54  
55  
56  
57  
58  
59  
60

1  
2  
3 1 with either oxygen desaturation of  $\geq 3\%$  or an EEG arousal from sleep, both lasting for at  
4 2 least 10 seconds. Apneas will be classified as obstructive, central or mixed according to the  
5 3 presence or absence of respiratory effort. The classification of hypopneas as obstructive or  
6 4 central will be based on the thoraco-abdominal band signal and the shape of the nasal  
7 5 respiratory pressure curve (flow limited aspect or not). The AHI is defined as the number of  
8 6 apneas and hypopneas per hour of sleep. Sleep will be scored manually according to AASM  
9 7 criteria (45).

### 15 8 Procedures

18 9 At the baseline visit, MSNA, ABPM, calf blood flow, HRV and catecholamines will be  
19 10 measured. Then, during a one week titration phase optimal CPAP pressure will be obtained  
20 11 over eight nights at home using an auto CPAP device (RESMED™) to obtain a fixed CPAP  
21 12 pressure value. The optimal pressure (95th percentile) will be determined by one expert  
22 13 researcher, based on visual evaluation of the raw data recordings from nights with no  
23 14 significant leaks. A minimum of continuous pressure use for 4 hours per night will be  
24 15 required. The pressure determined during the titration nights will be used as the therapeutic  
25 16 pressure in the fixed CPAP mode, whereas in APAP the pressure level will be adjusted  
26 17 between a minimal pressure of 6 cmH<sub>2</sub>O and a maximum of 16 cmH<sub>2</sub>O. After the titration  
27 18 phase, patients will be randomized to treatment with either APAP or fixed CPAP. Finally,  
28 19 following one month of treatment, MSNA, ABPM, calf blood flow, HRV and catecholamines  
29 20 will be measured for comparison with baseline. Figure 2 shows the study schema.

### 39 21 Statistical considerations

#### 42 22 Sample size

44 23 We powered the study based on the MSNA outcome. To date no previous study has  
45 24 compared these two PAP modalities using MSNA as primary outcome. Since there are no  
46 25 reliable MSNA data available, we hypothesized the impact of CPAP to be  $8 \pm 5$  bursts/min in  
47 26 the fixed CPAP group and  $5 \pm 5$  bursts/min in the APAP group. Assuming an alpha error of 5%,  
48 27 a statistical power of 80%, in unilateral situation, 34 patients per arm will need to be  
49 28 enrolled in the study.

1  
2  
3 1 In a group sequential design, firstly an interim analysis will be performed on data  
4 2 from the first 24 patients (12 per arm) with a nominal p value of 0.0081 required to  
5 3 demonstrate a significant difference between groups. If at the interim analysis, the observed  
6 4 p value for the primary outcome is greater than the nominal p value inclusions will continue  
7 5 until the final sample of 68 patients is reached. Conversely, if significance is observed, the  
8 6 patient inclusion can stop and no further inclusions will be needed.

### 13 14 7 Randomization

15  
16 8 After titration of fixed CPAP (lasting 8 nights), patients will be randomized to either  
17 9 fixed CPAP or APAP treatment. Randomization will be conducted by a statistician  
18 10 independent of the study using a computer-generated random numbers list (6 patients per  
19 11 block). This list will be transmitted to one of the investigators who will be responsible for  
20 12 installation of the device but not for the follow-up and evaluation of the patients. All other  
21 13 investigators, patients and outcome assessment technicians will be masked to the patient's  
22 14 group.

### 23 24 25 26 27 28 29 15 Statistical methodology and analyses

30  
31  
32 16 The analysis will be done following the Intention to treat method. Continuous  
33 17 variables will be expressed as median (25th/75th percentiles) or mean (SD), while categorical  
34 18 variables will be reported as absolute numbers and percentages for both groups. Baseline  
35 19 comparisons between groups will be made using a Student test or Mann-Whitney test,  
36 20 depending on validation of normal distribution. For discrete variables, a Chi-square test will  
37 21 be used. Normality will be assessed using the Shapiro-Wilk test. If significant differences are  
38 22 observed between arms, a multivariable regression will be performed. In case of missing  
39 23 data, an imputation strategy will be applied according to the percentage of missing values. If  
40 24 less than 5% of missing value are observed, simple imputation will be performed, based on  
41 25 the median for quantitative variables or on the most frequent values for qualitative  
42 26 variables. If the proportion of missing values is between 5 and 20%, multiple imputations will  
43 27 be performed.

1  
2  
3 1 Data management and statistical analyses will be performed using SAS® (version 9.4,  
4 2 SAS Institute, Cary, NC, USA).  
5  
6 3  
7

#### 8 4 Ethics

9  
10  
11 5 The current study will be conducted in accordance with the Declaration of Helsinki  
12 6 and the recommendations for Good Clinical Practice. The protocol was approved by the  
13 7 French Regional Ethics Committee (Comite de Protection des Personnes Sud Est V N° IRB:  
14 8 0006705 on 19 February 2018). Written informed consent will be signed by all study  
15 9 participants before enrollment in the study. Patients have the right to withdraw from the  
16 10 study without incurring any prejudice at any time. The protocol is registered on the  
17 11 ClinicalTrials.gov website (NCT03428516).  
18  
19  
20  
21  
22  
23  
24

#### 25 13 Patient and Public Involvement

26  
27 14 Patients, collaborators and sponsors were not directly involved in the design,  
28 15 recruitment and conduction of the study. Dissemination plans of the results include  
29 16 presentations at conferences and publication in peer-reviewed journals. Updates of the  
30 17 randomized trial will be available at ClinicalTrials.com. All patients will be informed that the  
31 18 dissemination of results will be accessible on request.  
32  
33  
34  
35  
36

#### 37 19 Sponsor and funding

38  
39 20 The sponsor of the study is Grenoble Alpes University Hospital, France. The principal  
40 21 investigator is Renaud Tamisier. Erika Treptow is supported by the *Coordenação de*  
41 22 *Aperfeiçoamento de Pessoal de Nível Superior* (CAPES) – Brazil. ResMed, “*Agir pour les*  
42 23 *maladies chroniques*” and the French National Research Agency in the framework of the  
43 24 “Investissements d’avenir” program (ANR-15-IDEX-02) will provide unrestricted funding. The  
44 25 collaborators and sponsors were not involved in the design of the study and will not  
45 26 influence the execution, analysis and publication of results.  
46  
47  
48  
49  
50  
51  
52  
53  
54  
55  
56  
57  
58  
59  
60

## **Discussion**

CPAP remains the first-line therapy for OSA patients. In order to determine the optimal pressure that will maintain airway patency during sleep, a titration made during full night polysomnography is required. However, this is costly, demands technical expertise and may result in a delay in the initiation of treatment. Furthermore, night-time AHI can be variable, depending on position, sleep architecture, overnight rostral fluid shifts and alcohol intake, which may influence the determination of the optimal effective pressure if performed during only one night (46, 47). Therefore, over the last few years there has been an exponential increase of the use of APAP for automatic titration prior to long-term treatment at home. This simplified procedure is associated with comparable outcomes (48) and a significant cost reduction (49).

Currently, in many countries especially in Europe, APAP is by far the most commonly used device for OSA treatment and gives a slight increase in PAP adherence (50). However, the increase in APAP use is accompanied by unresolved scientific questions: is APAP as effective as fixed CPAP in reducing cardiovascular risk? Is it safe to use APAP in patients with comorbidities? Do APAP and CPAP have the same efficacy in normalizing sleep in patients with OSA? The proposed study will focus on the cardiovascular response to these different PAP modalities. To achieve this, we shall use complementary reference tools to evaluate sympathetic activity in patients using fixed CPAP or APAP. Vascular and cardiac sympathetic activity will be explored in addition to circulating catecholamine levels.

Since its first description in 1967 (51) vascular sympathetic activity measured by microneurography has provided insights into our understanding of the pathophysiology of hypertension, cardiac failure and sleep apnea (16, 52). This method allows the recording of impulses in peripheral nerves and is the gold standard for measurement of vascular sympathetic activity. When applied by experienced professionals, MSNA is reproducible and allows evaluation between subjects before and after an intervention, with minor risks and side effects (43, 53). It has been demonstrated that intermittent hypoxia is a major contributor to inducing sympathetic activation in healthy humans and patients with OSA (13, 17, 54) and that treatment with CPAP lowers MSNA (55). One of the strengths of the present study is that, in addition to MSNA, we will measure heart rate variability and urinary catecholamines to assess cardiac and whole body sympathetic activity respectively.

1  
2  
3 1 Moreover, we will provide a better understanding of BP responses under the two PAP  
4 2 therapies and possibly identify the type of patients who would benefit the most from APAP.  
5  
6 3  
7

### 8 4 **Conclusions**

9  
10 5 The sympathetic APAP-CPAP protocol is key randomized controlled trial that will assess, for  
11 6 the first time, different PAP modalities that might differ in terms of the decrease in  
12 7 sympathetic activity they induce in patients with OSA. The results of the APAP-CPAP study  
13 8 should provide further clarification as to the cardiovascular benefits of an effective  
14 9 treatment for patients with OSA. In addition, the findings might have important implications  
15 10 for individualized therapeutic strategies by identifying the best phenotypes to be treated by  
16 11 a given PAP therapy.  
17  
18  
19  
20  
21  
22  
23

### 24 13 **Author contributions**

25 14 ET participated in the design of the study, wrote the article based on the study protocol, will  
26 15 include patients, and collect and analyze data into the protocol.

27 16 JLP and PL designed the study, wrote the study protocol, critically revised the manuscript  
28 17 and will include patients into the protocol.

29 18 SB participated in the design of the protocol, established the statistical analysis plan, and  
30 19 calculated the sample size.

31 20 CB revised the manuscript and will include patients into the protocol.

32 21 MD revised the manuscript and will include patients into the protocol.

33 22 HW participated in the design of the study and critically revised the manuscript.

34 23 RT designed the study, wrote the study protocol and article, critically revised the manuscript  
35 24 and will include patients, and collect and analyze data.

36 25 The submitted manuscript has been approved by all authors.  
37  
38  
39  
40  
41  
42  
43  
44  
45  
46  
47

### 48 27 **Acknowledgements**

49 28 The authors would like to thank Marie Peeters for trial management and Alison Foote  
50 29 (Grenoble Alpes University Hospital, Research division) for language revision.  
51  
52  
53  
54

### 55 31 **Funding**

56  
57  
58  
59  
60



1  
2  
3 1 ET is supported by the *Coordenação de Aperfeiçoamento de Pessoal de Nível Superior*  
4 2 (CAPES) – Brazil. This work was supported by unrestricted grant from ResMed, by the  
5 3 foundation *Agir pour les maladies chroniques* and by the French National Research Agency in  
6 4 the framework of the "Investissements d'avenir" program (ANR-15-IDEX-02).  
7  
8  
9

10 5 Competing interests

11  
12  
13 6 R Tamisier reports travel grants from Agiradom (a Home Healthcare provider) and  
14 7 research grants from Resmed.  
15  
16  
17  
18

19 9 Ethics approval

20  
21 10 The protocol was approved by the French Regional Ethics Committee (*Comite de*  
22 11 *Protection des Personnes Sud Est V*) on 19 February 2018 and is registered on  
23 12 ClinicalTrials.gov (NCT03428516).  
24  
25  
26  
27

28 14 Patient consent

29 15 Written informed consent will be signed by all study participants before enrollment  
30 16 in the study (see supplement materials).  
31  
32  
33  
34  
35  
36  
37  
38  
39  
40  
41  
42  
43  
44  
45  
46  
47  
48  
49  
50  
51  
52  
53  
54  
55  
56  
57  
58  
59  
60

1  
2  
3 **1** **Tables**

4  
5 **2** Table 1. Inclusion and exclusion criteria

| Inclusion criteria                                 | Exclusion criteria                                                   |
|----------------------------------------------------|----------------------------------------------------------------------|
| Patients aged 18 to 80 years                       | Pregnancy                                                            |
| OSA (AHI $\geq$ 20 events/ h)                      | Person deprived of liberty or subject to a legal protection measure. |
| Daytime sleepiness                                 | Patient with heart failure                                           |
| Naive of any pressure treatment for OSA            | Patient with central sleep apnea index above 20% of AHI              |
| Able to provide written informed consent           | Patient with unstable comorbidities that could influence the results |
| Not a vulnerable person or legally protected adult |                                                                      |

26  
27 **3**  
28  
29 **4** OSA, obstructive sleep apnea; AHI, apnea hypopnea index  
30  
31  
32  
33  
34 **6**  
35  
36  
37  
38  
39 **8**  
40  
41  
42  
43  
44 **10**  
45  
46  
47  
48  
49 **12**  
50  
51  
52  
53  
54 **14**  
55  
56  
57 **15**  
58  
59  
60

1  
2  
3  
4  
5  
6  
7  
8  
9  
10  
11  
12  
13  
14  
15  
16  
17  
18  
19  
20  
21  
22  
23  
24  
25  
26  
27  
28  
29  
30  
31  
32  
33  
34  
35  
36  
37  
38  
39  
40  
41  
42  
43  
44  
45  
46  
47

Table 2. Literature on the impact of CPAP versus APAP on BP

| Author (ref.)         | Year | Sample Size | Study design         | Duration | Intervention                                                                                                              | Findings                                                                                                                                                                                                                               |
|-----------------------|------|-------------|----------------------|----------|---------------------------------------------------------------------------------------------------------------------------|----------------------------------------------------------------------------------------------------------------------------------------------------------------------------------------------------------------------------------------|
| <b>Bloch KE (37)</b>  | 2017 | 208         | Randomized, parallel | 2 years  | APAP (5-15 cmH <sub>2</sub> O) vs CPAP (90 <sup>th</sup> percentile during titration)                                     | Reduction in MBP, SBP and DBP by 3-4 mmHg (ITT) and 4-6 mmHg (PPT), similar in APAP x CPAP *                                                                                                                                           |
| <b>Pépin JL (35)</b>  | 2016 | 322         | Randomized, parallel | 4 months | APAP (minimal interval of 5 cmH <sub>2</sub> O) vs CPAP (95 <sup>th</sup> percentile during titration)                    | CPAP was more effective in reducing 24h DBP than APAP * †                                                                                                                                                                              |
| <b>Marrone O (38)</b> | 2011 | 17          | Randomized, parallel | 2 months | APAP (5-18 cmH <sub>2</sub> O) vs CPAP (fixed pressure determined during titration)                                       | Treatment reduced SBP during sleep and DBP during both sleep and wakefulness. Similar reductions in BP were demonstrated in both groups *                                                                                              |
| <b>Patruno V (36)</b> | 2007 | 31          | Randomized, parallel | 3 months | APAP (4-15 cmH <sub>2</sub> O) vs CPAP (fixed pressure determined during titration)                                       | Significant reduction in SBP (from 144 ± 10 to 132 ± 8 mm Hg; p < 0.001) and DBP (from 88 ± 4 to 79 ± 6 mmHg; p < 0.001) in the CPAP group but not in the APAP group (SBP, 142 ± 12 to 136 ± 6 mm Hg; DBP, 87.5 ± 4 to 86 ± 4 mm Hg) † |
| <b>West SD (39)</b>   | 2006 | 98          | Randomized, parallel | 6 months | APAP vs APAP for 1 week and then CPAP (95 <sup>th</sup> percentile during titration) or CPAP (determined by an algorithm) | No difference between groups in MBP *                                                                                                                                                                                                  |

CPAP, continuous positive pressure; APAP, auto-adjusting continuous positive pressure; BP, blood pressure; MBP, mean blood pressure; SBP, systolic blood pressure; DBP, diastolic blood pressure; ITT, intention-to-treat analysis; PPT, per protocol analysis.

\* Ambulatory Blood Pressure Monitoring (24h) † Office blood pressure measurements.

### **Figure legend**

Figure 1. Settings, acquisition, recording and reporting of muscle sympathetic nerve activity (MSNA). Measurement of MSNA is obtained by placement of an un-insulated tungsten register electrode in the peroneal nerve in the popliteal fossae or close to the fibula head. The objective is to reach post ganglionic efferent sympathetic neurons. Potential voltage signal is recorded between the nerve electrode and a reference electrode placed on the external side of the knee. The acquired electrical signal is then amplified, band-filtered (700 to 2000 Hz), rectified and integrated. Sympathetic burst, which correspond to nerve firing, are detected and scored using an automatic software in order to minimize subjective interpretation of the signal MSNA results may be expressed in number of bursts per min or per 100 heart beats, Burst/min and bursts/100 hb respectively or using the sum of areas under the curve of all burst in arbitrary integration units per minute or per 100 heart beats, AUI/min and AUI/100 hb respectively.

### **Figure 2. Study protocol**

MSNA, Muscle Sympathetic Nerve Activity; HRV, heart rate variability; CPAP, fixed continuous positive pressure; APAP, auto-adjusting continuous positive pressure.

## References

1. Baguet JP, Barone-Rochette G, Tamisier R, Levy P, Pepin JL. Mechanisms of cardiac dysfunction in obstructive sleep apnea. *Nature reviews Cardiology*. 2012;9(12):679-88.
2. Yaggi HK, Concato J, Kernan WN, Lichtman JH, Brass LM, Mohsenin V. Obstructive sleep apnea as a risk factor for stroke and death. *The New England journal of medicine*. 2005;353(19):2034-41.
3. Gami AS, Olson EJ, Shen WK, Wright RS, Ballman KV, Hodge DO, Herges RM, et al. Obstructive sleep apnea and the risk of sudden cardiac death: a longitudinal study of 10,701 adults. (1558-3597 (Electronic)).
4. Sundstrom J, Neal B. Effects of Blood Pressure Reduction in Mild Hypertension. *Annals of internal medicine*. 2015;163(1):67-8.
5. Drager LF, McEvoy RD, Barbe F, Lorenzi-Filho G, Redline S, Initiative I. Sleep Apnea and Cardiovascular Disease: Lessons From Recent Trials and Need for Team Science. *Circulation*. 2017;136(19):1840-50.
6. Javaheri S, Barbe F, Campos-Rodriguez F, Dempsey JA, Khayat R, Javaheri S, et al. Sleep Apnea: Types, Mechanisms, and Clinical Cardiovascular Consequences. *J Am Coll Cardiol*. 2017;69(7):841-58.
7. Lim SS, Vos T, Flaxman AD, Danaei G, Shibuya K, Adair-Rohani H, et al. A comparative risk assessment of burden of disease and injury attributable to 67 risk factors and risk factor clusters in 21 regions, 1990-2010: a systematic analysis for the Global Burden of Disease Study 2010. *Lancet*. 2012;380(9859):2224-60.
8. Danaei G, Finucane MM, Lin JK, Singh GM, Paciorek CJ, Cowan MJ, et al. National, regional, and global trends in systolic blood pressure since 1980: systematic analysis of health examination surveys and epidemiological studies with 786 country-years and 5.4 million participants. *Lancet*. 2011;377(9765):568-77.
9. Whelton PK, Carey RM, Aronow WS, Casey DE, Jr., Collins KJ, Dennison Himmelfarb C, et al. 2017 ACC/AHA/AAPA/ABC/ACPM/AGS/APhA/ASH/ASPC/NMA/PCNA Guideline for the Prevention, Detection, Evaluation, and Management of High Blood Pressure in Adults: A Report of the American College of Cardiology/American Heart Association Task Force on Clinical Practice Guidelines. LID - HYP.000000000000065 [pii] LID - 10.1161/HYP.000000000000065 [doi] FAU - Whelton, Paul K. (1524-4563 (Electronic)).
10. Peppard PE, Young T, Palta M, Skatrud J. Prospective study of the association between sleep-disordered breathing and hypertension. *The New England journal of medicine*. 2000;342(19):1378-84.
11. Narkiewicz K, Somers VK. Obstructive sleep apnea as a cause of neurogenic hypertension. *Current hypertension reports*. 1999;1(3):268-73.
12. Levy P, Kohler M, McNicholas WT, Barbe F, McEvoy RD, Somers VK, et al. Obstructive sleep apnoea syndrome. *Nature reviews Disease primers*. 2015;1:15015.
13. Tamisier R, Pepin JL, Remy J, Baguet JP, Taylor JA, Weiss JW, et al. 14 nights of intermittent hypoxia elevate daytime blood pressure and sympathetic activity in healthy humans. *The European respiratory journal*. 2011;37(1):119-28.
14. Tamisier R, Tan CO, Pepin JL, Levy P, Taylor JA. Blood Pressure Increases in OSA due to Maintained Neurovascular Sympathetic Transduction: Impact of CPAP. *Sleep*. 2015;38(12):1973-80.
15. Tamisier R, Levy P, Pepin JL. Do patients with obstructive sleep apnoea deserve new dedicated antihypertensive strategies? *Thorax*. 2017;72(6):495-7.
16. Somers VK, Dyken ME, Clary MP, Abboud FM. Sympathetic neural mechanisms in obstructive sleep apnea. *The Journal of clinical investigation*. 1995;96(4):1897-904.

17. Gilmartin GS, Lynch M, Tamisier R, Weiss JW. Chronic intermittent hypoxia in humans during 28 nights results in blood pressure elevation and increased muscle sympathetic nerve activity. *American journal of physiology Heart and circulatory physiology*. 2010;299(3):H925-31.
18. Bratton DJ, Gaisl T, Wons AM, Kohler M. CPAP vs Mandibular Advancement Devices and Blood Pressure in Patients With Obstructive Sleep Apnea: A Systematic Review and Meta-analysis. *Jama*. 2015;314(21):2280-93.
19. Bratton DJ, Stradling JR, Barbe F, Kohler M. Effect of CPAP on blood pressure in patients with minimally symptomatic obstructive sleep apnoea: a meta-analysis using individual patient data from four randomised controlled trials. *Thorax*. 2014;69(12):1128-35.
20. Montesi SB, Edwards Ba Fau - Malhotra A, Malhotra A Fau - Bakker JP, Bakker JP. The effect of continuous positive airway pressure treatment on blood pressure: a systematic review and meta-analysis of randomized controlled trials. (1550-9397 (Electronic)).
21. Alajmi M, Mulgrew At Fau - Fox J, Fox J Fau - Davidson W, Davidson W Fau - Schulzer M, Schulzer M Fau - Mak E, Mak E Fau - Ryan CF, et al. Impact of continuous positive airway pressure therapy on blood pressure in patients with obstructive sleep apnea hypopnea: a meta-analysis of randomized controlled trials. (0341-2040 (Print)).
22. Bazzano LA, Khan Z, Reynolds K, He J. Effect of nocturnal nasal continuous positive airway pressure on blood pressure in obstructive sleep apnea. *Hypertension*. 2007;50(2):417-23.
23. Haentjens P, Van Meerhaeghe A Fau - Moscariello A, Moscariello A Fau - De Weerd S, De Weerd S Fau - Poppe K, Poppe K Fau - Dupont A, Dupont A Fau - Velkeniers B, et al. The impact of continuous positive airway pressure on blood pressure in patients with obstructive sleep apnea syndrome: evidence from a meta-analysis of placebo-controlled randomized trials. (0003-9926 (Print)).
24. McDaid C, Duree KH, Griffin SC, Weatherly HL, Stradling JR, Davies RJ, et al. A systematic review of continuous positive airway pressure for obstructive sleep apnoea-hypopnoea syndrome. *Sleep medicine reviews*. 2009;13(6):427-36.
25. Martinez-Garcia MA, Capote F, Campos-Rodriguez F, Lloberes P, Diaz de Atauri MJ, Somoza M, et al. Effect of CPAP on blood pressure in patients with obstructive sleep apnea and resistant hypertension: the HIPARCO randomized clinical trial. *Jama*. 2013;310(22):2407-15.
26. Barbe F, Duran-Cantolla J, Sanchez-de-la-Torre M, Martinez-Alonso M, Carmona C, Barcelo A, et al. Effect of continuous positive airway pressure on the incidence of hypertension and cardiovascular events in nonsleepy patients with obstructive sleep apnea: a randomized controlled trial. *Jama*. 2012;307(20):2161-8.
27. Pepin JL, Timsit JF, Tamisier R, Levy P. Is CPAP effective in reducing blood pressure in minimally symptomatic obstructive sleep apnoea? *Thorax*. 2014;69(12):1068-70.
28. Sanders MH, Montserrat JM, Farre R, Givelber RJ. Positive pressure therapy: a perspective on evidence-based outcomes and methods of application. *Proceedings of the American Thoracic Society*. 2008;5(2):161-72.
29. Hertegonne K, Bauters F. The value of auto-adjustable CPAP devices in pressure titration and treatment of patients with obstructive sleep apnea syndrome. *Sleep medicine reviews*. 2010;14(2):115-9.
30. Morgenthaler TI, Aurora RN, Brown T, Zak R, Alessi C, Boehlecke B, et al. Practice parameters for the use of autotitrating continuous positive airway pressure devices for titrating pressures and treating adult patients with obstructive sleep apnea syndrome: an update for 2007. An American Academy of Sleep Medicine report. *Sleep*. 2008;31(1):141-7.
31. Won CH. Man Versus Machine. *Journal of clinical sleep medicine : JCSM : official publication of the American Academy of Sleep Medicine*. 2017;13(2):167-8.
32. Ayas NT, Patel SR, Malhotra A, Schulzer M, Malhotra M, Jung D, et al. Auto-titrating versus standard continuous positive airway pressure for the treatment of obstructive sleep apnea: results of a meta-analysis. *Sleep*. 2004;27(2):249-53.

- 1  
2  
3 1 33. Fuchs FS, Wiest GH, Frank M, Harsch IA, Schahin SP, Hahn EG, et al. Auto-CPAP therapy for  
4 2 obstructive sleep apnea: induction of microarousals by automatic variations of CPAP pressure? *Sleep*.  
5 3 2002;25(5):514-8.  
6 4 34. Marrone O, Insalaco G, Bonsignore MR, Romano S, Salvaggio A, Bonsignore G. Sleep structure  
7 5 correlates of continuous positive airway pressure variations during application of an autotitrating  
8 6 continuous positive airway pressure machine in patients with obstructive sleep apnea syndrome.  
9 7 *Chest*. 2002;121(3):759-67.  
10 8 35. Pepin JL, Tamisier R, Baguet JP, Lepaulle B, Arbib F, Arnol N, et al. Fixed-pressure CPAP versus  
11 9 auto-adjusting CPAP: comparison of efficacy on blood pressure in obstructive sleep apnoea, a  
12 10 randomised clinical trial. *Thorax*. 2016;71(8):726-33.  
13 11 36. Patruno V, Aiolfi S, Costantino G, Murgia R, Selmi C, Malliani A, et al. Fixed and autoadjusting  
14 12 continuous positive airway pressure treatments are not similar in reducing cardiovascular risk factors  
15 13 in patients with obstructive sleep apnea. *Chest*. 2007;131(5):1393-9.  
16 14 37. Bloch KE, Huber F, Furian M, Latshang TD, Lo Cascio CM, Nussbaumer-Ochsner Y, et al.  
17 15 Autoadjusted versus fixed CPAP for obstructive sleep apnoea: a multicentre, randomised equivalence  
18 16 trial. *Thorax*. 2017.  
19 17 38. Marrone O, Salvaggio A, Bue AL, Bonanno A, Riccobono L, Insalaco G, et al. Blood pressure  
20 18 changes after automatic and fixed CPAP in obstructive sleep apnea: relationship with nocturnal  
21 19 sympathetic activity. *Clinical and experimental hypertension*. 2011;33(6):373-80.  
22 20 39. West SD, Jones DR, Stradling JR. Comparison of three ways to determine and deliver pressure  
23 21 during nasal CPAP therapy for obstructive sleep apnoea. *Thorax*. 2006;61(3):226-31.  
24 22 40. Karasulu L, Epozurk PO, Sokucu SN, Dalar L, Altin S. Improving Heart rate variability in sleep  
25 23 apnea patients: differences in treatment with auto-titrating positive airway pressure (APAP) versus  
26 24 conventional CPAP. *Lung*. 2010;188(4):315-20.  
27 25 41. Patruno V, Tobaldini E, Bianchi AM, Mendez MO, Coletti O, Costantino G, et al. Acute effects  
28 26 of autoadjusting and fixed continuous positive airway pressure treatments on cardiorespiratory  
29 27 coupling in obese patients with obstructive sleep apnea. *European journal of internal medicine*.  
30 28 2014;25(2):164-8.  
31 29 42. Hamner JW, Taylor JA. Automated quantification of sympathetic beat-by-beat activity,  
32 30 independent of signal quality. *Journal of applied physiology*. 2001;91(3):1199-206.  
33 31 43. Tan CO, Tamisier R, Hamner JW, Taylor JA. Characterizing sympathetic neurovascular  
34 32 transduction in humans. *PloS one*. 2013;8(1):e53769.  
35 33 44. Mancia G, De Backer G, Dominiczak A, Cifkova R, Fagard R, Germano G, et al. 2007 Guidelines  
36 34 for the Management of Arterial Hypertension: The Task Force for the Management of Arterial  
37 35 Hypertension of the European Society of Hypertension (ESH) and of the European Society of  
38 36 Cardiology (ESC). *Journal of hypertension*. 2007;25(6):1105-87.  
39 37 45. Berry RB, Brooks R, Gamaldo C, Harding SM, Lloyd RM, Quan SF, et al. AASM Scoring Manual  
40 38 Updates for 2017 (Version 2.4). *Journal of clinical sleep medicine : JCSM : official publication of the*  
41 39 *American Academy of Sleep Medicine*. 2017;13(5):665-6.  
42 40 46. White LH, Lyons OD, Yadollahi A, Ryan CM, Bradley TD. Night-to-night variability in  
43 41 obstructive sleep apnea severity: relationship to overnight rostral fluid shift. *Journal of clinical sleep*  
44 42 *medicine : JCSM : official publication of the American Academy of Sleep Medicine*. 2015;11(2):149-  
45 43 56.  
46 44 47. Bittencourt LR, Suchecki D, Tufik S, Peres C, Togeiro SM, Bagnato MC, et al. The variability of  
47 45 the apnoea-hypopnoea index. *Journal of sleep research*. 2001;10(3):245-51.  
48 46 48. Stradling JR, Barbour C, Pitson DJ, Davies RJ. Automatic nasal continuous positive airway  
49 47 pressure titration in the laboratory: patient outcomes. *Thorax*. 1997;52(1):72-5.  
50 48 49. Corral J, Sanchez-Quiroga MA, Carmona-Bernal C, Sanchez-Armengol A, de la Torre AS,  
51 49 Duran-Cantolla J, et al. Conventional Polysomnography Is Not Necessary for the Management of  
52 50 Most Patients with Suspected Obstructive Sleep Apnea. Noninferiority, Randomized Controlled Trial.  
53 51 *American journal of respiratory and critical care medicine*. 2017;196(9):1181-90.

- 1  
2  
3 1 50. Smith I, Nadig V, Lasserson TJ. Educational, supportive and behavioural interventions to  
4 2 improve usage of continuous positive airway pressure machines for adults with obstructive sleep  
5 3 apnoea. *Cochrane Database Syst Rev*. 2009(2):CD007736.  
6 4 51. Vallbo AB, Hagbarth KE. Impulses recorded with micro-electrodes in human muscle nerves  
7 5 during stimulation of mechanoreceptors and voluntary contractions. *Electroencephalogr Clin  
8 6 Neurophysiol*. 1967;23(4):392.  
9 7 52. Mark AL, Wallin BG. Microneurography: a technique for assessing central neural effects of  
10 8 adrenergic drugs on sympathetic outflow in humans. *Journal of cardiovascular pharmacology*. 1985;7  
11 9 Suppl 8:S67-9.  
12 10 53. Kimmerly DS, O'Leary DD, Shoemaker JK. Test-retest repeatability of muscle sympathetic  
13 11 nerve activity: influence of data analysis and head-up tilt. *Auton Neurosci*. 2004;114(1-2):61-71.  
14 12 54. Xie A, Skatrud JB, Crabtree DC, Puleo DS, Goodman BM, Morgan BJ. Neurocirculatory  
15 13 consequences of intermittent asphyxia in humans. *Journal of applied physiology*. 2000;89(4):1333-9.  
16 14 55. Narkiewicz K, Kato M, Phillips BG, Pesek CA, Davison DE, Somers VK. Nocturnal continuous  
17 15 positive airway pressure decreases daytime sympathetic traffic in obstructive sleep apnea.  
18 16 *Circulation*. 1999;100(23):2332-5.

17

18



1  
2  
3  
4  
5  
6  
7  
8  
9  
10  
11  
12  
13  
14  
15  
16  
17  
18  
19  
20  
21  
22  
23  
24  
25  
26  
27  
28  
29  
30  
31  
32  
33  
34  
35  
36  
37  
38  
39  
40  
41  
42  
43  
44  
45  
46  
47  
48  
49  
50  
51  
52  
53  
54  
55  
56  
57  
58  
59  
60

1            **Supplementary file**

2            2            Patient consent forms: French and English versions.

3

4

5

For peer review only

1  
2  
3 **Supplementary material – Consent form (original French version)**

4  
5 **FORMULAIRE DE CONSENTEMENT ECLAIRÉ**

6  
7  
8  
9 **Diminution du tonus sympathique chez les patients avec une apnée obstructive du**  
10 **sommeil: La CPP fixe est-elle plus efficace que la CPP auto ajusté?**

11  
12  
13 **Titre court : APAP CPAP**  
14  
15  
16  
17

18  
19  
20  
21 Promoteur de l'étude : CHU de Grenoble – DRCI (Direction de la Recherche Clinique et  
22 Innovation) : CHU de Grenoble, CS 10217, 38043 Grenoble Cedex 09 - Tel : 04 76 76 56 09  
23 Fax : 04 76 76 52 21

24  
25  
26  
27 Investigateur principal : Pr. Renaud Tamisier

28  
29  
30 Investigateurs du CHU de Grenoble participant à cette étude :

31  
32 Pr Jean-Louis Pépin, Pr Renaud Tamisier, Pr Patrick Levy, Dr Marie Destors, Dr Erika Treptow,  
33 Dr. Holger Whorle: Physiologie Sommeil et Exercice - Pôle Locomotion Rééducation et  
34 Physiologie; Dr Cecile Bosc : Centre Santé et Sommeil.  
35  
36

37  
38  
39 Le Dr .....m'a proposé de participer à l'étude APAP CPAP. Il m'a  
40 expliqué en détail les objectifs et le déroulement de celle-ci, ainsi que les bénéfices, les  
41 risques et les contraintes.  
42  
43

44  
45 Une notice d'information m'a été remise et j'ai eu suffisamment de temps pour la lire et  
46 prendre la décision d'accepter ou non de participer à l'étude. J'ai pu poser toutes les  
47 questions que je souhaitais et j'ai obtenu des réponses satisfaisantes. J'ai bien compris que  
48 ma participation à l'étude est volontaire et que je peux à tout moment retirer mon  
49 consentement, quelles que soient mes raisons, sans engager ma responsabilité et sans que  
50 cela modifie la qualité des soins qui me seront donnés, ni l'attention de mon médecin.  
51  
52  
53  
54  
55

1  
2  
3 1 J'ai bien pris connaissance que cette recherche sera conduite en conformité avec le Code de  
4 la Santé Publique.  
5 2  
6

7 3  
8  
9 4 J'ai eu l'assurance que les décisions qui s'imposent pour ma santé seront prises à tout  
10 moment, conformément à l'état actuel des connaissances médicales.  
11 5  
12 6

13  
14 7 J'ai compris que je ne dois pas participer à une autre recherche en même temps que celle-ci.  
15 8

16  
17  
18 9 En cours d'étude, tout élément nouveau me concernant et pouvant modifier mon  
19 consentement me sera communiqué.  
20 10  
21

22 11  
23  
24  
25 12 J'accepte que les données de mon dossier médical qui se rapportent à l'étude soient  
26 accessibles aux responsables de l'étude et aux représentants des autorités de santé. A  
27 13 l'exception de ces personnes, qui traiteront les informations dans le plus strict respect du  
28 14 secret médical, mon anonymat sera préservé.  
29 15  
30  
31

32 16  
33  
34  
35 17 J'ai pris connaissance que cette recherche a reçu l'avis favorable du Comité de Protection  
36 des Personnes et l'autorisation de l'ANSM le.  
37 18  
38

39 19  
40  
41  
42 20 Le promoteur de la recherche (CHU de Grenoble) a souscrit une assurance de responsabilité  
43 civile en cas de préjudice auprès de la société.  
44 21  
45

46 22  
47  
48 23 J'accepte que les données enregistrées à l'occasion de cette étude fassent l'objet d'un  
49 traitement informatisé par le service de Physiologie Sommeil et Exercice du CHU de  
50 24 Grenoble, responsable de l'analyse statistique. Je peux accéder, directement ou par  
51 25 l'intermédiaire d'un médecin de mon choix, à l'ensemble de mes données médicales. Mon  
52 26 droit d'accès, de rectification et d'opposition prévu par la loi "informatique et libertés"  
53 27  
54  
55  
56  
57  
58  
59  
60

1  
2  
3 1 s'exerce à tout moment, auprès du médecin en charge de la recherche.  
4

5 2  
6

7  
8 3 Mon acceptation de participer à l'étude ne dégage pas les médecins et les organisateurs de  
9 4 l'étude de leur responsabilité. Je conserve tous mes droits garantis par la loi.  
10  
11

12 5  
13

14 6 J'ai reçu une copie du présent document et j'ai été informé qu'une copie serait également  
15 7 conservée par l'investigateur et le promoteur dans des conditions garantissant la  
16 8 confidentialité et j'y consens.  
17  
18

19 9  
20  
21

22  
23 10 Je certifie avoir lu ce document ainsi que la notice d'information et accepte de participer,  
24 11 librement, à cette recherche, dans les conditions qui m'ont été précisées.  
25  
26

27 12  
28

29 13 En cas d'événements indésirables ou de problèmes, ou si j'ai d'autres questions au cours de  
30 14 ma participation, je pourrai contacter le médecin en charge de la recherche au numéro de  
31 15 téléphone suivant : .....  
32  
33

34 16  
35  
36

37  
38 17 Nom / Prénom du patient :

Nom du médecin :

39  
40 18 .....

.....

41  
42 19 .....

.....

43  
44 20 Date : ...../...../.....

Date : ...../...../.....

45  
46 21 Signature du patient :

Signature du médecin :

47  
48 22  
49

50  
51 23  
52

53 24  
54  
55

56 25  
57  
58

1  
2  
3  
4  
5  
6  
7  
8  
9  
10  
11  
12  
13  
14  
15  
16  
17  
18  
19  
20  
21  
22  
23  
24  
25  
26  
27  
28  
29  
30  
31  
32  
33  
34  
35  
36  
37  
38  
39  
40  
41  
42  
43  
44  
45  
46  
47  
48  
49  
50  
51  
52  
53  
54  
55  
56  
57  
58  
59  
60

1

For peer review only

1  
2  
3 1 **Supplementary material – Consent form (English version)**  
4

5  
6  
7 2 **Reduction of Sympathetic tone in OSA patients:**  
8

9 3 **Is CPAP more effective than APAP? – a randomized, parallel clinical trial protocol**  
10

11 4 Short title : APAP-CPAP  
12

13  
14 5 Study Sponsor: CHU de Grenoble – DRCI (Direction de la Recherche Clinique et Innovation) :  
15 6 CHU de Grenoble, CS 10217, 38043 Grenoble Cedex 09 - Tel : 04 76 76 56 09 Fax : 04 76 76  
16 7 52 21  
17

18  
19  
20 8 Principal investigator: Renaud Tamisier  
21

22  
23 9 Members of Grenoble Alpes University Hospital participating in this study :  
24

25 10 Pr Jean-Louis Pépin, Pr Renaud Tamisier, Pr Patrick Levy, Dr Marie Destors, Dr Erika Treptow,  
26 11 Dr. Holger Whorle: Physiologie Sommeil et Exercice - Pôle Locomotion Rééducation et  
27 12 Physiologie (Physiology, Sleep and Exercise – Centre for locomotion, Reeducation and  
28 13 Physiology); Dr Cecile Bosc: Centre Santé et Sommeil (Health and Sleep Center).  
29  
30  
31

32 14  
33  
34 15 Dr. ....has proposed that I participate in the study APAP-CPAP study. I have  
35 16 received detailed explanations about the objectives and procedures of the study, as well as  
36 17 its benefits, risks and constraints.  
37  
38  
39

40 18  
41  
42 19 I have received an information sheet and I've had enough time to read it and to make the  
43 20 decision to participate, or not, in the study. I've had the opportunity to ask all my questions  
44 21 and I've received satisfactory answers. I understood that my participation in the study is  
45 22 voluntary and that I can, at any time, withdraw my consent, whatever my reasons, without  
46 23 incurring any responsibility and without any modification in the treatment received.  
47  
48  
49

50 24 I have been informed that this study will be conducted according to the French Code of  
51 25 Public Health, and have been assured that all study procedures will be made in accordance  
52 26 with the current medical recommendations.  
53  
54  
55

56 27 I have understood that I should not participate in any other biomedical research protocol  
57  
58  
59

1  
2  
3 1 during the period of this study.

4  
5 2 During the study, I will be informed of any event concerning my health that could influence  
6  
7 3 my consent.

8  
9 4 I accept that the data in my medical file(s) related to the study will be accessible to the  
10  
11 5 study's collaborators and to representatives of the health authorities. With the exception of  
12  
13 6 these people, who will deal with my data in respect of professional secrecy, my anonymity  
14  
15 7 will be preserved.

16  
17 8 I have been informed that this research has been approved by the Regional Biomedical  
18  
19 9 Ethics committee (Comité de protection de Personnes) and authorized by the French  
20  
21 10 National Agency for the Safety of Medicines and Health Products.

22  
23 11 The sponsor of the study (Grenoble Alpes University Hospital) has contracted an additional  
24  
25 12 insurance of civil responsibility in case of harms.

26  
27 13 I accept that the data concerning me acquired during this study will be registered by the  
28  
29 14 Department of Physiology, Sleep and Exercise of Grenoble Alpes University Hospital, which is  
30  
31 15 responsible for the statistical analysis. I have the right to access, directly or through a  
32  
33 16 physician of my choice, the set of information and medical data concerning me. At any time I  
34  
35 17 will have the right of access and correction of computerized data according to the law on  
36  
37 18 "*informatique et libertés*" through the physician responsible for the research.

38  
39 19 My acceptance to participate in the study does not discharge the organizers and  
40  
41 20 investigators of the study from their responsibilities. I retain all my rights guaranteed by law.

42  
43 21 I have received a copy of the current consent sheet and I was informed that one copy will be  
44  
45 22 retained by the investigator and another by the sponsor under conditions guaranteeing  
46  
47 23 confidentiality.

48  
49 24 I certify that I have read this document as well as the patient information sheet and I freely  
50  
51 25 accept to participate in the study according to the conditions specified.

52  
53 26 In case of any undesirable events or problems, or if I have any other questions during my  
54  
55 27 participation of the study, I may contact the physician responsible for the research through  
56  
57 28 the telephone number +33 (0)4 76765516.

58  
59 29  
60 30 Surname / First Name of participant : Surname of investigating physician in :

1  
2  
3  
4  
5  
6  
7  
8  
9  
10  
11  
12  
13  
14  
15  
16  
17  
18  
19  
20  
21  
22  
23  
24  
25  
26  
27  
28  
29  
30  
31  
32  
33  
34  
35  
36  
37  
38  
39  
40  
41  
42  
43  
44  
45  
46  
47  
48  
49  
50  
51  
52  
53  
54  
55  
56  
57  
58  
59  
60

1 .....  
2

.....

2 .....  
3

.....

3 Date : ...../...../.....  
4

Date : ...../...../.....

4 Participant's signature :  
5

Physician's signature :  
6

For peer review only



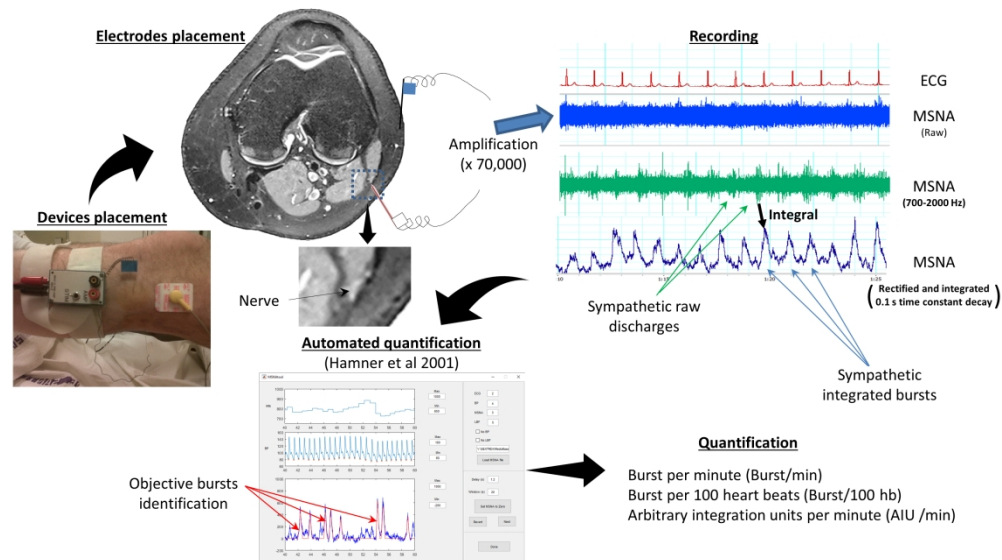

Figure 1. Settings, acquisition, recording and reporting of muscle sympathetic nerve activity (MSNA). Measurement of MSNA is obtained by placement of an un-insulated tungsten register electrode in the peroneal nerve in the popliteal fossae or close to the fibula head. The objective is to reach post ganglionic efferent sympathetic neurons. Potential voltage signal is recorded between the nerve electrode and a reference electrode placed on the external side of the knee. The acquired electrical signal is then amplified, band-filtered (700 to 2000 Hz), rectified and integrated. Sympathetic burst, which correspond to nerve firing, are detected and scored using an automatic software in order to minimize subjective interpretation of the signal MSNA results may be expressed in number of bursts per min or per 100 heart beats, Burst/min and bursts/100 hb respectively or using the sum of areas under the curve of all burst in arbitrary integration units per minute or per 100 heart beats, AUI/min and AUI/100 hb respectively.

254x142mm (300 x 300 DPI)

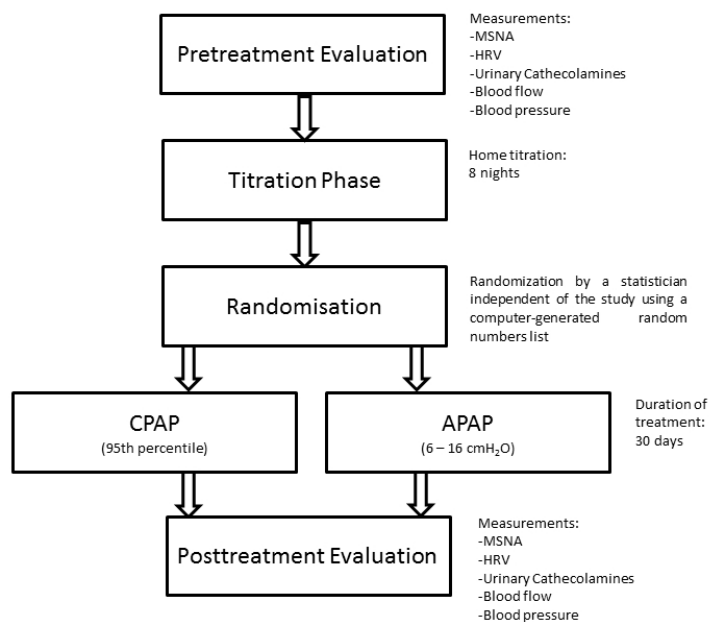

Figure 2. Study protocol MSNA, Muscle Sympathetic Nerve Activity; HRV, heart rate variability; CPAP, fixed continuous positive pressure; APAP, auto-adjusting continuous positive pressure.

254x190mm (96 x 96 DPI)

# BMJ Open

## Reduction in sympathetic tone in Obstructive sleep apnea patients: is fixed CPAP more effective than APAP? – a randomized, parallel trial protocol

|                                 |                                                                                                                                                                                                                                                                                                                                                                                                                                                                                                                                                          |
|---------------------------------|----------------------------------------------------------------------------------------------------------------------------------------------------------------------------------------------------------------------------------------------------------------------------------------------------------------------------------------------------------------------------------------------------------------------------------------------------------------------------------------------------------------------------------------------------------|
| Journal:                        | <i>BMJ Open</i>                                                                                                                                                                                                                                                                                                                                                                                                                                                                                                                                          |
| Manuscript ID                   | bmjopen-2018-024253.R1                                                                                                                                                                                                                                                                                                                                                                                                                                                                                                                                   |
| Article Type:                   | Protocol                                                                                                                                                                                                                                                                                                                                                                                                                                                                                                                                                 |
| Date Submitted by the Author:   | 09-Oct-2018                                                                                                                                                                                                                                                                                                                                                                                                                                                                                                                                              |
| Complete List of Authors:       | Treptow, Erika; 1. Université Grenoble Alpes, Pepin, Jean; Hôpital Universitaire de Grenoble, Bailly , Sebastien; Centre Hospitalier Universitaire Grenoble Alpes Hopital Michallon<br>Levy, P; Hypoxia Pathophysiology (HP2) Laboratory Joseph Fourier University<br>Bosc , Cecile ; Centre Santé et Sommeil<br>Destors, Marie; Centre Hospitalier Universitaire Grenoble Alpes Hopital Michallon<br>Woehrle, Holger; Lung Center Ulm<br>Tamisier, Renaud; Univ. Grenoble Alpes, HP2; Inserm, U1042; Grenoble Alps University Hospital, EFCR Laboratory |
| <b>Primary Subject Heading</b>: | Cardiovascular medicine                                                                                                                                                                                                                                                                                                                                                                                                                                                                                                                                  |
| Secondary Subject Heading:      | Diagnostics, Respiratory medicine                                                                                                                                                                                                                                                                                                                                                                                                                                                                                                                        |
| Keywords:                       | obstructive sleep apnea, Hypertension < CARDIOLOGY, continous positive airway pressure, SLEEP MEDICINE, sympathetic activity                                                                                                                                                                                                                                                                                                                                                                                                                             |
|                                 |                                                                                                                                                                                                                                                                                                                                                                                                                                                                                                                                                          |

SCHOLARONE™  
Manuscripts

1  
2  
3  
4 1 **Reduction in sympathetic tone in Obstructive sleep apnea patients:**  
5  
6 2 **is fixed CPAP more effective than APAP? – a randomized, parallel**  
7  
8 **trial protocol**  
9

10 **Erika Treptow<sup>1</sup>, Jean-Louis Pépin<sup>1</sup>, Sebastien Bailly<sup>1</sup>, Patrick Levy<sup>1</sup>, Cecile Bosc<sup>2</sup>, Marie**  
11 **Destors<sup>1</sup>, Holger Woehrle<sup>3</sup>, Renaud Tamisier<sup>1</sup>**  
12  
13  
14 6

- 15  
16  
17 7 1. University Grenoble Alpes, HP2 laboratory; Inserm U1042, Grenoble, France and  
18 8 Grenoble Alpes University Hospital, EFCR Laboratory, Thorax and Vessels Division,  
19 9 Grenoble, France.  
20  
21  
22 10 2. Health and Sleep Center, Grenoble, France.  
23  
24 11 3. Sleep and Ventilation Center Blaubeuren/ Ulm Lung Center, Ulm, Germany  
25

26 12 **Sponsor:** Grenoble Alpes University Hospital

27  
28 13 CS 10217, 38043 Grenoble Cedex 09 France  
29

30 14 **Corresponding authors:** Renaud Tamisier and Erika Treptow

31  
32 15 EFCR Laboratory, Grenoble Alpes University Hospital

33  
34 16 CS 10217 Grenoble 38043 Cedex 09 France  
35

36 17 e-mail: [rtamisier@chu-grenoble.fr](mailto:rtamisier@chu-grenoble.fr); [erikatpw@hotmail.com](mailto:erikatpw@hotmail.com)  
37

38  
39 18 Phone: +33 (0)476765516  
40

41 19 Sources of support: ET is supported by *Coordenação de Aperfeiçoamento de Pessoal de Nível*  
42 *Superior* (CAPES) – Brazil. This work was supported by unrestricted grants from ResMed,  
43 20 foundation *Agir pour les maladies chroniques* and by the French National Research Agency in  
44 21 the framework of the "Investissements d'avenir" program (ANR-15-IDEX-02).  
45  
46 22  
47  
48

49 23 Word count: 3104  
50

51 24 Number of figures and tables: 2 figure and 2 tables  
52  
53  
54 25  
55  
56 26  
57  
58  
59  
60

1  
2  
3 1  
4  
5 2 **Abbreviations:**  
6

7 3 ABPM: ambulatory BP monitoring  
8

9 4 AHI: apnea and hypopnea index  
10

11 5 APAP: auto-adjusting continuous pressure  
12

13 6 BP: blood pressure  
14

15 7 CPAP: continuous positive airway pressure  
16

17 8 DBP: diastolic blood pressure  
18

19 9 ECG: electrocardiography  
20

21 10 EEG: electroencephalography  
22

23 11 EMG: electromyography  
24

25 12 EOG: electrooculography  
26

27 13 HRV: heart rate variability  
28

29 14 ITT: intention-to-treat analysis  
30

31 15 MBP: mean blood pressure  
32

33 16 MSNA: muscle sympathetic nerve activity  
34

35 17 OSA: obstructive sleep apnea  
36

37 18 PPT: per protocol analysis  
38

39 19 SBP: systolic blood pressure  
40

41 20  
42

43 21  
44

45 22  
46

47 23  
48

49 24  
50

51 25  
52

53 26  
54

55 27  
56

57 28  
58

1  
2  
3 **1 Abstract (Word count: 299)**  
4

5 2 *Introduction:* Obstructive sleep apnea (OSA) is a prevalent disease associated with  
6 3 cardiovascular events. Hypertension is one of the major intermediary mechanisms leading to  
7 4 long-term cardiovascular adverse events. Intermittent hypoxia and hypercapnia associated  
8 5 with nocturnal respiratory events stimulate chemo-reflexes, resulting in sympathetic over-  
9 6 activity and blood pressure (BP) elevation. Continuous positive airway pressure (CPAP) is the  
10 7 primary treatment for OSA and induces a small but significant reduction in BP. The use of  
11 8 auto-adjusting continuous pressure (APAP) has increased in the last years and studies  
12 9 showed different ranges of BP reduction when comparing both modalities. However, the  
13 10 pathophysiological mechanisms implicated are not fully elucidated. Variations in pressure  
14 11 through the night inherent to APAP may induce persistent respiratory efforts and sleep  
15 12 fragmentation that might impair sympatho-vagal balance during sleep and result in smaller  
16 13 decreases in BP. Therefore, this double blind randomized controlled trial aims to compare  
17 14 muscle sympathetic nerve activity (MSNA) assessed by microneurography (reference  
18 15 method for measuring sympathetic activity) after one month of APAP versus fixed CPAP in  
19 16 treatment-naive OSA patients.

20 17 *Methods and analysis:* adult subjects with newly diagnosed OSA (apnea hypopnea index >  
21 18 20/h) will be randomized for treatment with APAP or fixed CPAP. Measurements of  
22 19 sympathetic activity by MSNA, heart rate variability and catecholamines will be obtained at  
23 20 baseline and after 30 days. The primary composite outcome will be the change in  
24 21 sympathetic tone measured by MSNA in bursts/min and bursts/100 heart beats. Sample size  
25 22 calculation was performed with bilateral assumption. We will use the t-Student test to  
26 23 compare changes of sympathetic tone between groups.

27 24 *Ethics and dissemination:* The protocol was approved by The French Regional Ethics  
28 25 Committee and registered on ClinicalTrials.gov (NCT03428516). The study started in March  
29 26 2018 with primary completion expected to March 2019. Dissemination plans of the results  
30 27 include presentations at conferences and publication in peer-reviewed journals.

31  
32  
33  
34  
35  
36  
37  
38  
39  
40  
41  
42  
43  
44  
45  
46  
47  
48  
49  
50  
51  
52 28 Trial registration number: NCT03428516  
53  
54  
55  
56  
57  
58  
59  
60

1  
2  
3 1 Keywords: obstructive sleep apnea, hypertension, continuous positive airway pressure, sleep  
4 2 medicine, sympathetic activity.  
5  
6  
7 3  
8  
9

10 4 *Strengths and limitations of the study:*

- 11  
12 5 • The analysis of vascular and cardiac sympathetic activity will be evaluated by  
13 6 complementary methods: microneurography of the peroneal nerve (the gold  
14 7 standard method), heart rate variability (HRV) and urinary catecholamines.  
15  
16  
17 8 • The use of 24h ambulatory blood pressure (BP) monitoring is more sensitive when  
18 9 assessing therapeutic interventions than office BP and provides prognostic guidance.  
19  
20  
21 10 • A statistician not involved in the data collection will randomly allocate subjects to one  
22 11 of the two positive airway pressure (PAP) modalities. All other investigators, patients  
23 12 and assessment technicians will be blinded to the patient's group.  
24  
25  
26 13 • The same make and model of CPAP device will be used both in Fixed and APAP  
27 14 modes.  
28  
29  
30 15 • The duration of exposure to treatment of one month is ample but might under-  
31 16 represent the chronic effects of PAP therapies on sympathetic activity.  
32  
33  
34 17  
35  
36 18  
37  
38  
39 19  
40  
41 20  
42  
43  
44 21  
45  
46 22  
47  
48  
49 23  
50  
51 24  
52  
53  
54 25  
55  
56 26  
57  
58  
59  
60

## **Introduction**

Obstructive sleep apnea (OSA) is associated with increased cardiovascular morbidity and mortality (1-6). Hypertension is the main intermediary mechanism implicated in cardiovascular risk (7-9). There is a dose-response relationship between indices of OSA severity and hypertension (10, 11). Accordingly, one of the most common objectives when treating OSA is blood pressure (BP) reduction in order to prevent or reduce long-term cardiovascular adverse events.

OSA is characterized by partial (hypopnea) or complete (apnea) upper airway collapses during sleep (12). Sympathetic activation is the main intermediary mechanism for BP elevation in OSA patients (11, 13). The repetitive occurrence of respiratory events leading to intermittent hypoxia and hypercapnia results in stimulation of central and peripheral chemoreflexes enhancing sympathetic activity and, subsequently increasing vascular tone and promoting blood pressure elevation (14). Chronic sympathetic activation induces vascular remodeling and, frequently, uncontrolled or resistant hypertension(15). In OSA patients, nighttime sympathetic over-activation is associated with the non-dipping pattern of BP and the high sympathetic tone persists during wakefulness (16). In the early course of the disease, even non-hypertensive subjects exhibit increased BP and muscle sympathetic nerve activity in response to chronic intermittent hypoxia (13, 17). Muscle sympathetic nerve activity (MSNA) is one of the reference methods for measuring sympathetic activity and understanding the pathophysiology of neurogenic hypertension (18). Moreover, MSNA changes across time or after intervention are corresponding with arterial blood pressure changes in prehypertension (19).

In different models of hypertension only intermittent hypoxia, which is the main stimuli in OSA, causes neurogenesis modulation in hippocampus (20). In human, intermittent hypoxic exposure induces after 2 and 4 weeks an increase in daytime MSNA (13, 17). This increase in sympathetic tone was suggested in the early 90ies as a mechanism of hypertension in OSA (16, 21). Therefore, MSNA measurement is of particular interest in showing the effect of OSA treatment as a surrogate marker of cardiovascular outcomes. Although several studies have demonstrated the beneficial effects of OSA treatment by continuous positive airway pressure (CPAP) in sympathetic activation (14, 22-24), this



1  
2  
3 1 measurement has never been evaluated in patients under Auto-adjusting continuous  
4 2 pressure (APAP). MSNA consists of a technique of microneurography minimally invasive that  
5 3 measures the sympathetic nerve activity of the peroneal nerve.  
6  
7

8  
9 4 CPAP remains the gold standard therapeutic option for the treatment of moderate  
10 5 and severe OSA. Several systematic reviews and meta-analyses (25-31) have demonstrated  
11 6 limited but significant improvements in BP (a reduction of about 2 mmHg in 24-h mean BP).  
12 7 Better results are achieved in specific phenotypes with more severe OSA, higher BP at  
13 8 baseline and adherent to PAP therapies (use of CPAP  $\geq$  4 hours/night)(26, 32-34).  
14  
15  
16  
17

18 9 APAP changes the pressure delivered throughout the night depending on events  
19 10 detected, with the goal of applying the minimal effective pressure (35-38) thus reducing side  
20 11 effects and improving adherence. The average overnight applied pressure is significantly  
21 12 lower with APAP for the same range of improvement in the apnea-hypopnea index (AHI)  
22 13 (39). However, the continuous variations in pressure associated with the functioning of APAP  
23 14 devices potentially induce micro-arousals, and change sleep macrostructure in some  
24 15 patients (38, 40, 41). This might limit the decrease in sympathetic activity during the night  
25 16 when treating OSA and consequently result in a smaller reduction of BP.  
26  
27  
28  
29  
30  
31  
32

33 17 Studies have demonstrated controversial results on the impact of the two pressure  
34 18 modalities (fixed versus auto-adjusting) on blood pressure reduction (table 1). Although  
35 19 some authors reported superiority with fixed pressure (42, 43) other clinical trials reported  
36 20 no significant difference between APAP and CPAP (44-46). A recent study that evaluated 208  
37 21 patients with a longer than usual follow up of 2 years demonstrated comparable reductions  
38 22 in sleepiness and blood pressure with similar OSA-related costs for both treatments (44).  
39 23 Karasulu *et al*(47) and Patruno *et al*(48) have demonstrated lower reduction in cardiac  
40 24 sympathetic activity using heart rate variability (HRV) in OSA patients and obese OSA  
41 25 patients during APAP treatment compared with fixed CPAP. However, neither study was  
42 26 randomized and Patruno evaluated only a specific population of obese patients with severe  
43 27 OSA, which limits the generalizability of the results. In a small study of adult males, without  
44 28 antihypertensive treatment, Marrone *et al*(41), evaluated BP changes after treatment with  
45 29 APAP versus CPAP. As a secondary outcome, they reported sympathetic activity by  
46 30 measurement of catecholamines. Norepinephrine decreased significantly after treatment in  
47  
48  
49  
50  
51  
52  
53  
54  
55  
56  
57  
58  
59  
60

1  
2  
3 1 the APAP group but not in the CPAP group and normetanephrine decreased significantly in  
4 2 both groups. Overall, there is a lack of well-designed studies evaluating the mechanisms  
5 3 underlying specific BP responses under APAP versus fixed CPAP. In this context, the aim of  
6 4 the present study is to compare vascular sympathetic tone after one month of treatment  
7 5 with fixed versus auto-adjusting pressure by microneurography in newly diagnosed OSA  
8 6 patients.

## 14 7 **Methods and analysis**

### 16 8 **Study design**

19 9 This study is a prospective, single-site, randomized, double-blind, parallel, one  
20 10 month-controlled trial.

### 23 11 **Objectives**

#### 26 12 *Primary research objective*

28 13 The main objective is to compare change in vascular sympathetic tone measured by  
29 14 Muscle Sympathetic Nerve Activity (MSNA) microneurography after one month of APAP  
30 15 versus after one month of fixed CPAP in treatment-naïve moderate to severe OSA patients.

34 16 The primary composite outcome will be the change in sympathetic tone measured by  
35 17 MSNA in bursts/min and bursts/100heart beats between baseline and after one month of  
36 18 treatment.

#### 40 19 *Secondary research objectives*

42 20 The secondary objectives will be to compare the following variables before and after  
43 21 treatment:

- 46 22 - Ambulatory BP monitoring (24h ABPM): mean blood pressure (MBP),systolic blood  
47 23 pressure(SBP) and diastolic blood pressure DBP, during 24h periods as well as daytime and  
48 24 night-time measurements.
- 51 25 - Urinary catecholamines (24h collection): epinephrine, norepinephrine, and dopamine.
- 53 26 - Heart Rate Variability as an indicator of cardiac sympathovagal balance.

## Population

Consecutive adult outpatients attending a tertiary hospital sleep center (*Grenoble Alpes University Hospital – France*), with an established diagnosis of obstructive sleep apnea by full-night polysomnography (apnea-hypopnea index > 20/hour), daytime sleepiness (Epworth Sleepiness Scale > 10) (49) and willing to receive positive airway pressure treatment, will be invited to participate in the study. The inclusion and exclusion criteria are presented in table 2. Written informed consent will be obtained from all participants by a sleep physician study investigator (supplementary file).

## Materials

### Muscle Sympathetic Nerve Activity (MSNA)

We will obtain MSNA from nerve recordings using standard tungsten microelectrodes inserted into the peroneal nerve into the popliteal area, after localization by electric surface stimulation (Figure 1). Signals will be filtered (700-2000 Hz), amplified (x 70,000) and full-wave rectified. The rectified signal will be integrated (0.1 second moving window) for display and for recording (Nerve Traffic Analyzer, Model 662c-3, University of Iowa, Bioengineering Dept., Iowa City, IA). Electrode position in muscle fascicles will be confirmed by pulse synchronous bursts of activity occurring 1.2-1.4 s after the ECG QRS complex, reproducible activation during the second phase of the Valsalva maneuver, elicitation of afferent nerve activity by mild muscle stretching and the absence of response to startle. Doppler popliteal vascular flows (DWL500EZ) will be measured during time periods concomitant from measurement of MSNA, HR (3-lead ECG) and arterial blood pressure. Beat-by-beat arterial BP for vascular doppler leg resistance calculations will be measured using the CNAP® system the same time period. All these signals will be digitalized and recorded for off-line analysis on Powerlab system. These measurements will be performed before and after PAP therapy on morning sessions, fasten since 12 AM from foods and any beverage except water, during room air breathing. We will average nerve activity, heart rate and arterial BP over 5-minute windows of data collection at baseline and post-PAP therapy. Sympathetic bursts will be identified using a specific algorithm described by Hamner and colleagues (50) using Matlab software (The Mathworks Inc., Natick, MA USA). For purposes of quantification MSNA will be

1  
2  
3 1 reported in at least five minutes periods and expressed as burst frequency (bursts/min and  
4 2 bursts/100 heart beats).

5  
6  
7 3 Blood flow

8  
9 4 Popliteal blood velocity will be recorded using a 4-MHz Doppler probe (Multidop T2,  
10 5 DWL) at the popliteal fossa of the contralateral leg to the sympathetic nerve recording.

11  
12  
13 6 Several parameters will be extracted from the above measurements: sympathetic  
14 7 vascular tone, blood pressure and blood flow. Furthermore, we shall calculate vascular  
15 8 resistance and vascular sympathetic tone and blood pressure gains, as previously described  
16 9 (14, 51).

17  
18  
19  
20  
21 10 Blood Pressure

22  
23  
24 11 Ambulatory blood pressure monitoring (ABPM) will be measured in the dominant  
25 12 arm over 24 hours at 15 min intervals during daytime and every 30 minutes nighttime (ABP  
26 13 monitor 90207, Spacelabs Healthcare, Issaquah WA). Blood pressure acquisition began at a  
27 14 morning session and ended 24 hours later. The following ABPM parameters will be studied:  
28 15 mean SBP, mean DBP and mean HR over 24 hours, the same mean values during the daytime  
29 16 (7.00 am to 10.00 pm) and at night-time (10.00 pm to 7.00 am). The normal night-time  
30 17 physiological dipping BP is expected to be > 10%. The summary values in the ABPM report  
31 18 for each patient will be used in the data analysis. This is an average by subject and by  
32 19 recording session (at baseline and 1 month). Data relating to the average daytime and night-  
33 20 time systolic BP (SBP), diastolic BP (DBP), and mean BP (MBP) will be recorded. SBP values of  
34 21 > 260 mmHg or < 70 mmHg and DBP > 150 mmHg or < 40 mmHg will be automatically  
35 22 eliminated. Daytime hypertension is defined as daytime SBP > 135 mmHg and/or DBP > 85  
36 23 mmHg, and night-time hypertension as SBP > 120 mmHg and/or DBP > 70 mmHg (52).

37  
38  
39  
40  
41  
42  
43 24 Clinical BPs (SBP and DBP) will be measured by mercury sphygmomanometer on  
44 25 three occasions in line with the European Society of Hypertension–European Society of  
45 26 Cardiology and American College of Cardiology/ American Heart Association guidelines(9,  
46 27 53). Mean arterial BP (MABP) will be calculated as  $DBP + 1/3(SBP-DBP)$ .

1  
2  
3 1 Each recording will be validated only if the following quality criteria are met: cuff size  
4 2 adapted to the diameter of the arm, calibration of the device, full 24 hours' duration of  
5 3 recording comprising at least 48 valid measures and no more than two missing time slots.  
6  
7

#### 8 9 4 Catecholamine measurements

10  
11 5 24h urine samples will be collected, acidified with acetic acid and stored at -20°C until  
12 6 analysis. Catecholamines (epinephrine, norepinephrine, and dopamine) will be measured in  
13 7 one millilitre of urine by high-performance liquid chromatography with electrochemical  
14 8 detection (Coularray Detector, ESA Dionex, Chelmsford, USA).  
15  
16  
17  
18

#### 19 9 Polysomnography

20  
21 10 Full night polysomnography will be performed at our sleep laboratory. The following  
22 11 physiological variables will be monitored: electroencephalography (EEG), electrooculography  
23 12 (EOG), electromyography (EMG), electrocardiography (ECG), oral and nasal airflows, chest  
24 13 and abdominal respiratory effort through inductance plethysmography, snoring, body  
25 14 position, oxyhemoglobin saturation by pulse oximetry and heart rate. Continuous recordings  
26 15 will be taken with electrode positions C3/A2-C4/A1-Cz/01 of the international 10–20  
27 16 Electrode Placement System, along with eye movements, chin electromyogram and ECG  
28 17 with a modified V2 lead. Airflow will be measured with nasal pressure prongs together with  
29 18 the sum of oral and nasal thermistor signals. Respiratory effort will be monitored using  
30 19 abdominal and thoracic bands. Oxygen saturation will be measured using a pulse oximeter.  
31 20 Respiratory events will be classified according to the American Academy of Sleep Medicine's  
32 21 guidelines (54). An apnea is defined as the complete cessation of airflow for at least 10  
33 22 seconds and hypopnea as a reduction of at least 30% in the nasal pressure signal associated  
34 23 with either oxygen desaturation of  $\geq 3\%$  or an EEG arousal from sleep, both lasting for at  
35 24 least 10 seconds. Apneas will be classified as obstructive, central or mixed according to the  
36 25 presence or absence of respiratory effort. The classification of hypopneas as obstructive or  
37 26 central will be based on the thoraco-abdominal band signal and the shape of the nasal  
38 27 respiratory pressure curve (flow limited aspect or not). The AHI is defined as the number of  
39 28 apneas and hypopneas per hour of sleep. Sleep will be scored manually according to AASM  
40 29 criteria (54).  
41  
42  
43  
44  
45  
46  
47  
48  
49  
50  
51  
52  
53  
54  
55  
56  
57  
58  
59  
60

## Procedures

At the baseline visit, MSNA, ABPM, calf blood flow, HRV and catecholamines will be measured. Then, during a one week titration phase optimal CPAP pressure will be obtained over eight nights at home using an auto CPAP device (RESMED™) to obtain a fixed CPAP pressure value. The optimal pressure (95th percentile) will be determined by one expert researcher, based on visual evaluation of the raw data recordings from nights with no significant leaks. The pressure determined during the titration nights will be used as the therapeutic pressure in the fixed CPAP mode, whereas in APAP the pressure level will be adjusted between a minimal pressure of 6 cmH<sub>2</sub>O and a maximum of 16 cmH<sub>2</sub>O. After the titration phase, participants with a minimum usage of 4 hours per night will be randomized to treatment with either APAP or fixed CPAP. During treatment, the healthcare provider of the device (AgiRadom) will be responsible for solving potential problems with usage (e.g. mask leaks, side effects). The healthcare provider employees are trained in research good clinical practice, and how to maintain the blindness of allocation to patients and researchers during randomized trials. Finally, following one month of treatment, MSNA, ABPM, calf blood flow, HRV and catecholamines will be measured for comparison with baseline. Figure 2 shows the study schema.

## Statistical considerations

### Sample size

We powered the study based on the MSNA outcome. To date no previous study has compared these two PAP modalities using MSNA as primary outcome. Since there are no reliable MSNA data available, we hypothesized the impact of CPAP to be 8±5 bursts/min in one arm and 5±5 bursts/min in the other arm with no *a priori* assumption. Assuming an alpha error of 5%, a statistical power of 80%, in bilateral situation, 34 patients per arm will need to be enrolled in the study. In the sample size, we anticipate that 10 % will not meet the criteria of compliance to pressure support after 1 week, and 10% more will drop out before termination of the study.

Because it is a pilot study, we will perform a group sequential design, firstly an interim analysis will be performed on data from the first 24 patients (12 per arm) with a

1  
2  
3 1 nominal p value of 0.0081 required to demonstrate a significant difference between groups.  
4 2 If at the interim analysis, the observed p value for the primary outcome is greater than the  
5 3 nominal p value inclusions will continue until the final sample of 68 patients is reached.  
6 4 Conversely, if significance is observed, the patient inclusion would stop and no further  
7 5 inclusions will be needed. This interim analysis will be performed by a blinded statistical  
8 6 which have no regard on the randomization list neither contacts with the investigator nor  
9 7 involvement in the study.

### 15 8 Randomization

18 9 After titration of fixed CPAP (lasting 8 nights), participants with a minimum usage of 4  
19 10 hours per night will be randomized to either fixed CPAP or APAP treatment. Randomization  
20 11 will be conducted by a statistician independent of the study using a computer-generated  
21 12 random numbers list (6 patients per block). Randomization list was provided by the clinical  
22 13 research department of Grenoble Alpes university hospital and the randomization list is held  
23 14 and followed by two independent persons from the study. These persons provide allocation  
24 15 directly to the healthcare provider maintaining blindness of the patient and the  
25 16 investigators.

### 32 17 Statistical methodology and analyses

35 18 The analysis will be done following the Intention to treat method. Continuous  
36 19 variables will be expressed as median (25th/75th percentiles) or mean (SD), while categorical  
37 20 variables will be reported as absolute numbers and percentages for both groups. Baseline  
38 21 comparisons between groups will be made using a Student test or Mann-Whitney test,  
39 22 depending on validation of normal distribution. For discrete variables, a Chi-square test will  
40 23 be used. Normality will be assessed using the Shapiro-Wilk test. If significant differences are  
41 24 observed between arms, a multivariable regression will be performed. In case of missing  
42 25 data, an imputation strategy will be applied according to the percentage of missing values. If  
43 26 less than 5% of missing value are observed, simple imputation will be performed, based on  
44 27 the median for quantitative variables or on the most frequent values for qualitative  
45 28 variables. If the proportion of missing values is between 5 and 20%, multiple imputations will  
46 29 be performed by using MCM chains for qualitative variables or full conditional specification  
47 30 for quantitative variables. Variables with more than 20% of missing values will not be taken

1  
2  
3 1 into account. The main outcome, difference between one-month and baseline values will be  
4 2 analyzed by using a Student t-test. In case of multivariable analysis, a linear mixed model will  
5 3 be performed by including a random effect for patient.  
6  
7

8  
9 4 Data management and statistical analyses will be performed using SAS® (version 9.4,  
10 5 SAS Institute, Cary, NC, USA).  
11  
12 6

### 13 7 Ethics

14  
15 8 The current study will be conducted in accordance with the Declaration of Helsinki  
16 9 and the recommendations for Good Clinical Practice. The protocol was approved by The  
17 10 French Regional Ethics Committee (*Comite de Protection des Personnes Sud Est V N° IRB:*  
18 11 *0006705* on 19 February 2018). Written informed consent (supplemental file) will be signed  
19 12 by all study participants before enrollment in the study. Patients have the right to withdraw  
20 13 from the study without incurring any prejudice at any time. The protocol is registered on the  
21 14 ClinicalTrials.gov website (NCT03428516). The study started in March 2018 with primary  
22 15 completion expected in March 2019.  
23  
24  
25  
26  
27  
28  
29  
30  
31  
32 16

### 33 17 Patient and Public Involvement

34  
35  
36 18 Patients, collaborators and sponsors were not directly involved in the design,  
37 19 recruitment and conduction of the study. Dissemination plans of the results include  
38 20 presentations at conferences and publication in peer-reviewed journals. Updates of the  
39 21 randomized trial will be available at ClinicalTrials.com. All patients will be informed that the  
40 22 dissemination of results will be accessible on request.  
41  
42  
43  
44

### 45 23 Sponsor and funding

46  
47  
48 24 The sponsor of the study is Grenoble Alpes University Hospital, France. The principal  
49 25 investigator is Renaud Tamisier. Erika Treptow is supported by the *Coordenação de*  
50 26 *Aperfeiçoamento de Pessoal de Nível Superior (CAPES)* – Brazil. ResMed, “*Agir pour les*  
51 27 *maladies chroniques*” and the French National Research Agency in the framework of the  
52 28 “*Investissements d’avenir*” program (ANR-15-IDEX-02) will provide unrestricted funding. The  
53  
54  
55  
56  
57  
58  
59  
60



1  
2  
3 1 collaborators and sponsors were not involved in the design of the study and will not  
4 2 influence the execution, analysis and publication of results.  
5  
6 3  
7  
8  
9  
10  
11  
12  
13  
14  
15  
16  
17  
18  
19  
20  
21  
22  
23  
24  
25  
26  
27  
28  
29  
30  
31  
32  
33  
34  
35  
36  
37  
38  
39  
40  
41  
42  
43  
44  
45  
46  
47  
48  
49  
50  
51  
52  
53  
54  
55  
56  
57  
58  
59  
60

For peer review only

## **Discussion**

CPAP remains the first-line therapy for OSA patients. In order to determine the optimal pressure that will maintain airway patency during sleep, a titration made during full night polysomnography is required. However, this is costly, demands technical expertise and may result in a delay in the initiation of treatment. Furthermore, night-time AHI can be variable, depending on position, sleep architecture, overnight rostral fluid shifts and alcohol intake, which may influence the determination of the optimal effective pressure if performed during only one night(55, 56). Therefore, over the last few years there has been an exponential increase of the use of APAP for automatic titration prior to long-term treatment at home. This simplified procedure is associated with comparable outcomes (57) and a significant cost reduction (58).

Currently, in many countries especially in Europe, APAP is by far the most commonly used device for OSA treatment and gives a slight increase in PAP adherence (59). However, the increase in APAP use is accompanied by unresolved scientific questions: is APAP as effective as fixed CPAP in reducing cardiovascular risk? Is it safe to use APAP in patients with comorbidities? Do APAP and CPAP have the same efficacy in normalizing sleep in patients with OSA? The proposed study will focus on the cardiovascular response to these different PAP modalities. To achieve this, we shall use complementary reference tools to evaluate sympathetic activity in patients using fixed CPAP or APAP. Vascular and cardiac sympathetic activity will be explored in addition to circulating catecholamine levels.

Since its first description in 1967 (60) vascular sympathetic activity measured by microneurography has provided insights into our understanding of the pathophysiology of hypertension, cardiac failure and sleep apnea (16, 18, 61). This method allows the recording of impulses in peripheral nerves and is the gold standard for measurement of vascular sympathetic activity. When applied by experienced professionals, MSNA is reproducible and allows evaluation between subjects before and after an intervention, with minor risks and side effects (51, 62). It has been demonstrated that intermittent hypoxia is a major contributor to inducing sympathetic activation in healthy humans and patients with OSA (13, 17, 63) and that treatment with CPAP lowers MSNA (23). One of the strengths of the present

1 study is that, in addition to MSNA, we will measure heart rate variability and urinary  
2 catecholamines to assess cardiac and whole body sympathetic activity respectively.

3 Moreover, we will provide a better understanding of BP responses under the two PAP  
4 therapies and possibly identify the type of patients who would benefit the most from APAP.

5 The sympathetic APAP-CPAP protocol is key randomized controlled trial that will assess, for  
6 the first time, different PAP modalities that might differ in terms of the decrease in  
7 sympathetic activity they induce in patients with OSA. The results of the APAP-CPAP study  
8 should provide further clarification as to the cardiovascular benefits of an effective  
9 treatment for patients with OSA. In addition, the findings might have important implications  
10 for individualized therapeutic strategies by identifying the best phenotypes to be treated by  
11 a given PAP therapy.

### 12 **Author contributions**

13 ET participated in the design of the study, wrote the article based on the study protocol, will  
14 include patients, collect and analyze data into the protocol.

15 JLP and PL designed the study, wrote the study protocol, critically revised the manuscript  
16 and will include patients into the protocol.

17 SB participated in the design of the protocol, established the statistical analysis plan, and  
18 calculated the sample size.

19 CB revised the manuscript and will include patients into the protocol.

20 MD revised the manuscript and will include patients into the protocol.

21 HW participated in the design of the study and critically revised the manuscript.

22 RT designed the study, wrote the study protocol and article, critically revised the manuscript  
23 and will include patients, and collect and analyze data.

24 The submitted manuscript has been approved by all authors.

### 25 **Acknowledgements**

26 The authors would like to thank Marie Peeters for trial management and Alison Foote  
27 (Grenoble Alpes University Hospital, Research division) for language revision.

### 28 **Funding**

1  
2  
3 1 ET is supported by *Coordenação de Aperfeiçoamento de Pessoal de Nível Superior*  
4 2 (CAPES) – Brazil. This work was supported by unrestricted grant from ResMed, by the  
5 3 foundation *Agir pour les maladies chroniques* and by the French National Research Agency in  
6 4 the framework of the "Investissements d'avenir" program (ANR-15-IDEX-02).  
7  
8  
9

10 5 Competing interests

11  
12  
13 6 RTamisier reports travel grants from Agiradom (a Home Healthcare provider) and  
14 7 research grants from Resmed.  
15  
16  
17

18 9 Ethics approval

19  
20  
21 10 The protocol was approved by the French Regional Ethics Committee (*Comite de*  
22 11 *Protection des Personnes SudEst V*) on 19 February 2018 and is registered on  
23 12 ClinicalTrials.gov (NCT03428516).  
24  
25  
26

27 14 Patient consent

28  
29 15 Written informed consent will be signed by all study participants before enrollment  
30 16 in the study (see supplement materials).  
31  
32  
33  
34  
35  
36  
37  
38  
39  
40  
41  
42  
43  
44  
45  
46  
47  
48  
49  
50  
51  
52  
53  
54  
55  
56  
57  
58  
59  
60

## Tables

Table 1. Literature on the impact of CPAP versus APAP on BP

| Author<br>(ref.)          | Year | Sample<br>Size | Study design            | Duration | Intervention                                                                                                                     | Findings                                                                                                                                                                                                                                       |
|---------------------------|------|----------------|-------------------------|----------|----------------------------------------------------------------------------------------------------------------------------------|------------------------------------------------------------------------------------------------------------------------------------------------------------------------------------------------------------------------------------------------|
| <b>Bloch KE<br/>(44)</b>  | 2017 | 208            | Randomized,<br>parallel | 2 years  | APAP (5-15 cmH <sub>2</sub> O) vs CPAP (90 <sup>th</sup><br>percentile during titration)                                         | Reduction in MBP, SBP and DBP by 3-4 mmHg (ITT) and 4-6 mmHg (PPT),<br>similar in APAP x CPAP *                                                                                                                                                |
| <b>Pépin JL<br/>(43)</b>  | 2016 | 322            | Randomized,<br>parallel | 4 months | APAP (minimal interval of 5 cmH <sub>2</sub> O)<br>vsCPAP (95 <sup>th</sup> percentile during<br>titration)                      | CPAP was more effective in reducing 24h DBP than APAP * †                                                                                                                                                                                      |
| <b>Marrone O<br/>(45)</b> | 2011 | 17             | Randomized,<br>parallel | 2 months | APAP (5-18 cmH <sub>2</sub> O) vs CPAP (fixed<br>pressure determined during<br>titration)                                        | Treatment reduced SBP during sleep and DBP during both sleep and<br>wakefulness. Similar reductions in BP were demonstrated in both groups *                                                                                                   |
| <b>Patruno V<br/>(42)</b> | 2007 | 31             | Randomized,<br>parallel | 3 months | APAP (4-15 cmH <sub>2</sub> O) vs CPAP (fixed<br>pressure determined during<br>titration)                                        | Significant reduction in SBP (from 144 ± 10 to 132 ± 8 mm Hg; p < 0.001)<br>and DBP (from 88 ± 4 to 79 ± 6 mmHg; p < 0.001) in the CPAP group but not<br>in the APAP group (SBP, 142 ± 12 to 136 ± 6 mm Hg;DBP, 87.5 ± 4 to 86 ± 4<br>mm Hg) † |
| <b>West SD<br/>(46)</b>   | 2006 | 98             | Randomized,<br>parallel | 6 months | APAPvs APAP for 1 week and then<br>CPAP (95 <sup>th</sup> percentile during<br>titration)or CPAP (determined by<br>an algorithm) | No difference between groups in MBP *                                                                                                                                                                                                          |

CPAP, continuous positive pressure; APAP, auto-adjusting continuous positive pressure; BP, blood pressure; MBP, mean blood pressure; SBP, systolic blood pressure; DBP, diastolic blood pressure; ITT, intention-to-treat analysis; PPT, per protocol analysis.

\*Ambulatory Blood Pressure Monitoring (24h) † Office blood pressure measurements.

1  
2  
3  
4  
5 1  
6  
7 2  
8  
9  
10 3  
11  
12 4  
13  
14  
15  
16  
17  
18  
19  
20  
21  
22  
23  
24  
25  
26  
27  
28  
29  
30  
31  
32  
33 5  
34  
35  
36  
37  
38  
39  
40  
41  
42  
43  
44  
45  
46  
47

Table 2. Inclusion and exclusion criteria

| Inclusion criteria                                 | Exclusion criteria                                                   |
|----------------------------------------------------|----------------------------------------------------------------------|
| Patients aged 18 to 80 years                       | Pregnancy                                                            |
| OSA (AHI $\geq$ 20 events/ h)                      | Person deprived of liberty or subject to a legal protection measure. |
| Daytime sleepiness                                 | Patient with heart failure                                           |
| Naive of any pressure treatment for OSA            | Patient with central sleep apnea index above 20% of AHI              |
| Able to provide written informed consent           | Patient with unstable comorbidities that could influence the results |
| Not a vulnerable person or legally protected adult |                                                                      |

OSA, obstructive sleep apnea; AHI, apnea hypopnea index

### **Figure legend**

Figure 1. Settings, acquisition, recording and reporting of muscle sympathetic nerve activity (MSNA). Measurement of MSNA is obtained by placement of an un-insulated tungsten register electrode in the peroneal nerve in the popliteal fossae or close to the fibula head. The objective is to reach post ganglionic efferent sympathetic neurons. Potential voltage signal is recorded between the nerve electrode and a reference electrode placed on the external side of the knee. The acquired electrical signal is then amplified, band-filtered (700 to 2000 Hz), rectified and integrated. Sympathetic burst, which correspond to nerve firing, are detected and scored using an automatic software in order to minimize subjective interpretation of the signal MSNA results may be expressed in number of bursts per min or per 100 heart beats, Burst/min and bursts/100 heart beats respectively or using the sum of areas under the curve of all burst in arbitrary integration units per minute or per 100 heart beats, AUI/min and AUI/100 heart beats respectively.

Figure 2. Study protocol

MSNA, Muscle Sympathetic Nerve Activity; HRV, heart rate variability; CPAP, fixed continuous positive pressure; APAP, auto-adjusting continuous positive pressure.

## References

1. Baguet JP, Barone-Rochette G, Tamisier R, Levy P, Pepin JL. Mechanisms of cardiac dysfunction in obstructive sleep apnea. *Nature reviews Cardiology*. 2012;9(12):679-88.
2. Yaggi HK, Concato J, Kernan WN, Lichtman JH, Brass LM, Mohsenin V. Obstructive sleep apnea as a risk factor for stroke and death. *The New England journal of medicine*. 2005;353(19):2034-41.
3. Gami AS, Olson Ej Fau - Shen WK, Shen Wk Fau - Wright RS, Wright Rs Fau - Ballman KV, Ballman Kv Fau - Hodge DO, Hodge Do Fau - Herges RM, et al. Obstructive sleep apnea and the risk of sudden cardiac death: a longitudinal study of 10,701 adults. (1558-3597 (Electronic)).
4. Sundstrom J, Neal B. Effects of Blood Pressure Reduction in Mild Hypertension. *Annals of internal medicine*. 2015;163(1):67-8.
5. Drager LF, McEvoy RD, Barbe F, Lorenzi-Filho G, Redline S, Initiative I. Sleep Apnea and Cardiovascular Disease: Lessons From Recent Trials and Need for Team Science. *Circulation*. 2017;136(19):1840-50.
6. Javaheri S, Barbe F, Campos-Rodriguez F, Dempsey JA, Khayat R, Javaheri S, et al. Sleep Apnea: Types, Mechanisms, and Clinical Cardiovascular Consequences. *J Am Coll Cardiol*. 2017;69(7):841-58.
7. Lim SS, Vos T, Flaxman AD, Danaei G, Shibuya K, Adair-Rohani H, et al. A comparative risk assessment of burden of disease and injury attributable to 67 risk factors and risk factor clusters in 21 regions, 1990-2010: a systematic analysis for the Global Burden of Disease Study 2010. *Lancet*. 2012;380(9859):2224-60.
8. Danaei G, Finucane MM, Lin JK, Singh GM, Paciorek CJ, Cowan MJ, et al. National, regional, and global trends in systolic blood pressure since 1980: systematic analysis of health examination surveys and epidemiological studies with 786 country-years and 5.4 million participants. *Lancet*. 2011;377(9765):568-77.
9. Whelton Pk Fau - Carey RM, Carey Rm Fau - Aronow WS, Aronow WS, Casey DE, Jr., Collins KJ, Dennison Himmelfarb C, et al. 2017 ACC/AHA/AAPA/ABC/ACPM/AGS/APhA/ASH/ASPC/NMA/PCNA Guideline for the Prevention, Detection, Evaluation, and Management of High Blood Pressure in Adults: A Report of the American College of Cardiology/American Heart Association Task Force on Clinical Practice Guidelines. LID - HYP.0000000000000065 [pii] LID - 10.1161/HYP.0000000000000065 [doi] FAU - Whelton, Paul K. (1524-4563 (Electronic)).
10. Peppard PE, Young T, Palta M, Skatrud J. Prospective study of the association between sleep-disordered breathing and hypertension. *The New England journal of medicine*. 2000;342(19):1378-84.
11. Narkiewicz K, Somers VK. Obstructive sleep apnea as a cause of neurogenic hypertension. *Current hypertension reports*. 1999;1(3):268-73.
12. Levy P, Kohler M, McNicholas WT, Barbe F, McEvoy RD, Somers VK, et al. Obstructive sleep apnoea syndrome. *Nature reviews Disease primers*. 2015;1:15015.
13. Tamisier R, Pepin JL, Remy J, Baguet JP, Taylor JA, Weiss JW, et al. 14 nights of intermittent hypoxia elevate daytime blood pressure and sympathetic activity in healthy humans. *The European respiratory journal*. 2011;37(1):119-28.
14. Tamisier R, Tan CO, Pepin JL, Levy P, Taylor JA. Blood Pressure Increases in OSA due to Maintained Neurovascular Sympathetic Transduction: Impact of CPAP. *Sleep*. 2015;38(12):1973-80.
15. Tamisier R, Levy P, Pepin JL. Do patients with obstructive sleep apnoea deserve new dedicated antihypertensive strategies? *Thorax*. 2017;72(6):495-7.
16. Somers VK, Dyken ME, Clary MP, Abboud FM. Sympathetic neural mechanisms in obstructive sleep apnea. *The Journal of clinical investigation*. 1995;96(4):1897-904.
17. Gilmartin GS, Lynch M, Tamisier R, Weiss JW. Chronic intermittent hypoxia in humans during 28 nights results in blood pressure elevation and increased muscle sympathetic nerve activity. *American journal of physiology Heart and circulatory physiology*. 2010;299(3):H925-31.
18. Shoemaker JK, Klassen SA, Badrov MB, Fadel PJ. Fifty years of microneurography: learning the language of the peripheral sympathetic nervous system in humans. *J Neurophysiol*. 2018;119(5):1731-44.
19. Hering D, Kucharska W, Chrostowska M, Narkiewicz K. Age-dependent sympathetic neural responses to ss1 selective beta-blockade in untreated hypertension-related tachycardia. *Blood Press*. 2018;27(3):158-65.
20. Pedroso D, Nunes AR, Diogo LN, Oudot C, Monteiro EC, Brenner C, et al. Hippocampal neurogenesis response: What can we expect from two different models of hypertension? *Brain Res*. 2016;1646:199-206.
21. Carlson JT, Hedner J, Elam M, Ejnell H, Sellgren J, Wallin BG. Augmented resting sympathetic activity in awake patients with obstructive sleep apnea. *Chest*. 1993;103(6):1763-8.



- 1  
2  
3 1 22. Usui K, Bradley TD, Spaak J, Ryan CM, Kubo T, Kaneko Y, et al. Inhibition of awake sympathetic nerve  
4 2 activity of heart failure patients with obstructive sleep apnea by nocturnal continuous positive airway pressure.  
5 3 J Am Coll Cardiol. 2005;45(12):2008-11.  
6 4 23. Narkiewicz K, Kato M, Phillips BG, Pesek CA, Davison DE, Somers VK. Nocturnal continuous positive  
7 5 airway pressure decreases daytime sympathetic traffic in obstructive sleep apnea. Circulation.  
8 6 1999;100(23):2332-5.  
9 7 24. Waradekar NV, Sinoway LI, Zwillich CW, Leuenberger UA. Influence of treatment on muscle  
10 8 sympathetic nerve activity in sleep apnea. American journal of respiratory and critical care medicine.  
11 9 1996;153(4 Pt 1):1333-8.  
12 10 25. Bratton DJ, Gaisl T, Wons AM, Kohler M. CPAP vs Mandibular Advancement Devices and Blood  
13 11 Pressure in Patients With Obstructive Sleep Apnea: A Systematic Review and Meta-analysis. Jama.  
14 12 2015;314(21):2280-93.  
15 13 26. Bratton DJ, Stradling JR, Barbe F, Kohler M. Effect of CPAP on blood pressure in patients with minimally  
16 14 symptomatic obstructive sleep apnoea: a meta-analysis using individual patient data from four randomised  
17 15 controlled trials. Thorax. 2014;69(12):1128-35.  
18 16 27. Montesi SB, Edwards Ba Fau - Malhotra A, Malhotra A Fau - Bakker JP, Bakker JP. The effect of  
19 17 continuous positive airway pressure treatment on blood pressure: a systematic review and meta-analysis of  
20 18 randomized controlled trials. (1550-9397 (Electronic)).  
21 19 28. Alajmi M, Mulgrew At Fau - Fox J, Fox J Fau - Davidson W, Davidson W Fau - Schulzer M, Schulzer M  
22 20 Fau - Mak E, Mak E Fau - Ryan CF, et al. Impact of continuous positive airway pressure therapy on blood  
23 21 pressure in patients with obstructive sleep apnea hypopnea: a meta-analysis of randomized controlled trials.  
24 22 (0341-2040 (Print)).  
25 23 29. Bazzano LA, Khan Z, Reynolds K, He J. Effect of nocturnal nasal continuous positive airway pressure on  
26 24 blood pressure in obstructive sleep apnea. Hypertension. 2007;50(2):417-23.  
27 25 30. Haentjens P, Van Meerhaeghe A Fau - Moscariello A, Moscariello A Fau - De Weerdts S, De Weerdts S  
28 26 Fau - Poppe K, Poppe K Fau - Dupont A, Dupont A Fau - Velkeniers B, et al. The impact of continuous positive  
29 27 airway pressure on blood pressure in patients with obstructive sleep apnea syndrome: evidence from a meta-  
30 28 analysis of placebo-controlled randomized trials. (0003-9926 (Print)).  
31 29 31. McDaid C, Duree KH, Griffin SC, Weatherly HL, Stradling JR, Davies RJ, et al. A systematic review of  
32 30 continuous positive airway pressure for obstructive sleep apnoea-hypopnoea syndrome. Sleep medicine  
33 31 reviews. 2009;13(6):427-36.  
34 32 32. Martinez-Garcia MA, Capote F, Campos-Rodriguez F, Lloberes P, Diaz de Atauri MJ, Somoza M, et al.  
35 33 Effect of CPAP on blood pressure in patients with obstructive sleep apnea and resistant hypertension: the  
36 34 HIPARCO randomized clinical trial. Jama. 2013;310(22):2407-15.  
37 35 33. Barbe F, Duran-Cantolla J, Sanchez-de-la-Torre M, Martinez-Alonso M, Carmona C, Barcelo A, et al.  
38 36 Effect of continuous positive airway pressure on the incidence of hypertension and cardiovascular events in  
39 37 nonsleepy patients with obstructive sleep apnea: a randomized controlled trial. Jama. 2012;307(20):2161-8.  
40 38 34. Pepin JL, Timsit JF, Tamisier R, Levy P. Is CPAP effective in reducing blood pressure in minimally  
41 39 symptomatic obstructive sleep apnoea? Thorax. 2014;69(12):1068-70.  
42 40 35. Sanders MH, Montserrat JM, Farre R, Givelber RJ. Positive pressure therapy: a perspective on  
43 41 evidence-based outcomes and methods of application. Proceedings of the American Thoracic Society.  
44 42 2008;5(2):161-72.  
45 43 36. Hertegeonne K, Bauters F. The value of auto-adjustable CPAP devices in pressure titration and  
46 44 treatment of patients with obstructive sleep apnea syndrome. Sleep medicine reviews. 2010;14(2):115-9.  
47 45 37. Morgenthaler TI, Aurora RN, Brown T, Zak R, Alessi C, Boehlecke B, et al. Practice parameters for the  
48 46 use of autotitrating continuous positive airway pressure devices for titrating pressures and treating adult  
49 47 patients with obstructive sleep apnea syndrome: an update for 2007. An American Academy of Sleep Medicine  
50 48 report. Sleep. 2008;31(1):141-7.  
51 49 38. Won CH. Man Versus Machine. Journal of clinical sleep medicine : JCSM : official publication of the  
52 50 American Academy of Sleep Medicine. 2017;13(2):167-8.  
53 51 39. Ayas NT, Patel SR, Malhotra A, Schulzer M, Malhotra M, Jung D, et al. Auto-titrating versus standard  
54 52 continuous positive airway pressure for the treatment of obstructive sleep apnea: results of a meta-analysis.  
55 53 Sleep. 2004;27(2):249-53.  
56 54 40. Fuchs FS, Wiest GH, Frank M, Harsch IA, Schahin SP, Hahn EG, et al. Auto-CPAP therapy for obstructive  
57 55 sleep apnea: induction of microarousals by automatic variations of CPAP pressure? Sleep. 2002;25(5):514-8.  
58 56 41. Marrone O, Insalaco G, Bonsignore MR, Romano S, Salvaggio A, Bonsignore G. Sleep structure  
59 57 correlates of continuous positive airway pressure variations during application of an autotitrating continuous

- 1  
2  
3 1 positive airway pressure machine in patients with obstructive sleep apnea syndrome. *Chest*. 2002;121(3):759-  
4 2 67.  
5 3 42. Patruno V, Aiolfi S, Costantino G, Murgia R, Selmi C, Malliani A, et al. Fixed and autoadjusting  
6 4 continuous positive airway pressure treatments are not similar in reducing cardiovascular risk factors in  
7 5 patients with obstructive sleep apnea. *Chest*. 2007;131(5):1393-9.  
8 6 43. Pepin JL, Tamisier R, Baguet JP, Lepaulle B, Arbib F, Arnol N, et al. Fixed-pressure CPAP versus auto-  
9 7 adjusting CPAP: comparison of efficacy on blood pressure in obstructive sleep apnoea, a randomised clinical  
10 8 trial. *Thorax*. 2016;71(8):726-33.  
11 9 44. Bloch KE, Huber F, Furian M, Latshang TD, Lo Cascio CM, Nussbaumer-Ochsner Y, et al. Autoadjusted  
12 10 versus fixed CPAP for obstructive sleep apnoea: a multicentre, randomised equivalence trial. *Thorax*. 2017.  
13 11 45. Marrone O, Salvaggio A, Bue AL, Bonanno A, Riccobono L, Insalaco G, et al. Blood pressure changes  
14 12 after automatic and fixed CPAP in obstructive sleep apnea: relationship with nocturnal sympathetic activity.  
15 13 *Clinical and experimental hypertension*. 2011;33(6):373-80.  
16 14 46. West SD, Jones DR, Stradling JR. Comparison of three ways to determine and deliver pressure during  
17 15 nasal CPAP therapy for obstructive sleep apnoea. *Thorax*. 2006;61(3):226-31.  
18 16 47. Karasulu L, Epozturk PO, Sokucu SN, Dalar L, Altin S. Improving Heart rate variability in sleep apnea  
19 17 patients: differences in treatment with auto-titrating positive airway pressure (APAP) versus conventional  
20 18 CPAP. *Lung*. 2010;188(4):315-20.  
21 19 48. Patruno V, Tobaldini E, Bianchi AM, Mendez MO, Coletti O, Costantino G, et al. Acute effects of  
22 20 autoadjusting and fixed continuous positive airway pressure treatments on cardiorespiratory coupling in obese  
23 21 patients with obstructive sleep apnea. *European journal of internal medicine*. 2014;25(2):164-8.  
24 22 49. Johns MW. A new method for measuring daytime sleepiness: the Epworth sleepiness scale. *Sleep*.  
25 23 1991;14(6):540-5.  
26 24 50. Hamner JW, Taylor JA. Automated quantification of sympathetic beat-by-beat activity, independent of  
27 25 signal quality. *Journal of applied physiology*. 2001;91(3):1199-206.  
28 26 51. Tan CO, Tamisier R, Hamner JW, Taylor JA. Characterizing sympathetic neurovascular transduction in  
29 27 humans. *PloS one*. 2013;8(1):e53769.  
30 28 52. Williams B, Mancia G, Spiering W, Agabiti Rosei E, Azizi M, Burnier M, et al. 2018 ESC/ESH Guidelines  
31 29 for the management of arterial hypertension: The Task Force for the management of arterial hypertension of  
32 30 the European Society of Cardiology and the European Society of Hypertension: The Task Force for the  
33 31 management of arterial hypertension of the European Society of Cardiology and the European Society of  
34 32 Hypertension. *Journal of hypertension*. 2018;36(10):1953-2041.  
35 33 53. Mancia G, De Backer G, Dominiczak A, Cifkova R, Fagard R, Germano G, et al. 2007 Guidelines for the  
36 34 Management of Arterial Hypertension: The Task Force for the Management of Arterial Hypertension of the  
37 35 European Society of Hypertension (ESH) and of the European Society of Cardiology (ESC). *Journal of*  
38 36 *hypertension*. 2007;25(6):1105-87.  
39 37 54. Berry RB, Brooks R, Gamaldo C, Harding SM, Lloyd RM, Quan SF, et al. AASM Scoring Manual Updates  
40 38 for 2017 (Version 2.4). *Journal of clinical sleep medicine : JCSM : official publication of the American Academy*  
41 39 *of Sleep Medicine*. 2017;13(5):665-6.  
42 40 55. White LH, Lyons OD, Yadollahi A, Ryan CM, Bradley TD. Night-to-night variability in obstructive sleep  
43 41 apnea severity: relationship to overnight rostral fluid shift. *Journal of clinical sleep medicine : JCSM : official*  
44 42 *publication of the American Academy of Sleep Medicine*. 2015;11(2):149-56.  
45 43 56. Bittencourt LR, Suchecki D, Tufik S, Peres C, Togeiro SM, Bagnato MC, et al. The variability of the  
46 44 apnoea-hypopnoea index. *Journal of sleep research*. 2001;10(3):245-51.  
47 45 57. Stradling JR, Barbour C, Pitson DJ, Davies RJ. Automatic nasal continuous positive airway pressure  
48 46 titration in the laboratory: patient outcomes. *Thorax*. 1997;52(1):72-5.  
49 47 58. Corral J, Sanchez-Quiroga MA, Carmona-Bernal C, Sanchez-Armengol A, de la Torre AS, Duran-Cantolla  
50 48 J, et al. Conventional Polysomnography Is Not Necessary for the Management of Most Patients with Suspected  
51 49 Obstructive Sleep Apnea. Noninferiority, Randomized Controlled Trial. *American journal of respiratory and*  
52 50 *critical care medicine*. 2017;196(9):1181-90.  
53 51 59. Smith I, Nadig V, Lasserson TJ. Educational, supportive and behavioural interventions to improve usage  
54 52 of continuous positive airway pressure machines for adults with obstructive sleep apnoea. *Cochrane Database*  
55 53 *Syst Rev*. 2009(2):CD007736.  
56 54 60. Vallbo AB, Hagbarth KE. Impulses recorded with micro-electrodes in human muscle nerves during  
57 55 stimulation of mechanoreceptors and voluntary contractions. *Electroencephalogr Clin Neurophysiol*.  
58 56 1967;23(4):392.

- 1  
2  
3 1 61. Mark AL, Wallin BG. Microneurography: a technique for assessing central neural effects of adrenergic  
4 2 drugs on sympathetic outflow in humans. *Journal of cardiovascular pharmacology*. 1985;7 Suppl 8:S67-9.  
5 3 62. Kimmerly DS, O'Leary DD, Shoemaker JK. Test-retest repeatability of muscle sympathetic nerve  
6 4 activity: influence of data analysis and head-up tilt. *Auton Neurosci*. 2004;114(1-2):61-71.  
7 5 63. Xie A, Skatrud JB, Crabtree DC, Puleo DS, Goodman BM, Morgan BJ. Neurocirculatory consequences of  
8 6 intermittent asphyxia in humans. *Journal of applied physiology*. 2000;89(4):1333-9.

9 7

10  
11  
12 8

13  
14  
15  
16  
17  
18  
19  
20  
21  
22  
23  
24  
25  
26  
27  
28  
29  
30  
31  
32  
33  
34  
35  
36  
37  
38  
39  
40  
41  
42  
43  
44  
45  
46  
47  
48  
49  
50  
51  
52  
53  
54  
55  
56  
57  
58  
59  
60

For peer review only

1  
2  
3  
4  
5  
6  
7  
8  
9  
10  
11  
12  
13  
14  
15  
16  
17  
18  
19  
20  
21  
22  
23  
24  
25  
26  
27  
28  
29  
30  
31  
32  
33  
34  
35  
36  
37  
38  
39  
40  
41  
42  
43  
44  
45  
46  
47  
48  
49  
50  
51  
52  
53  
54  
55  
56  
57  
58  
59  
60

1

For peer review only

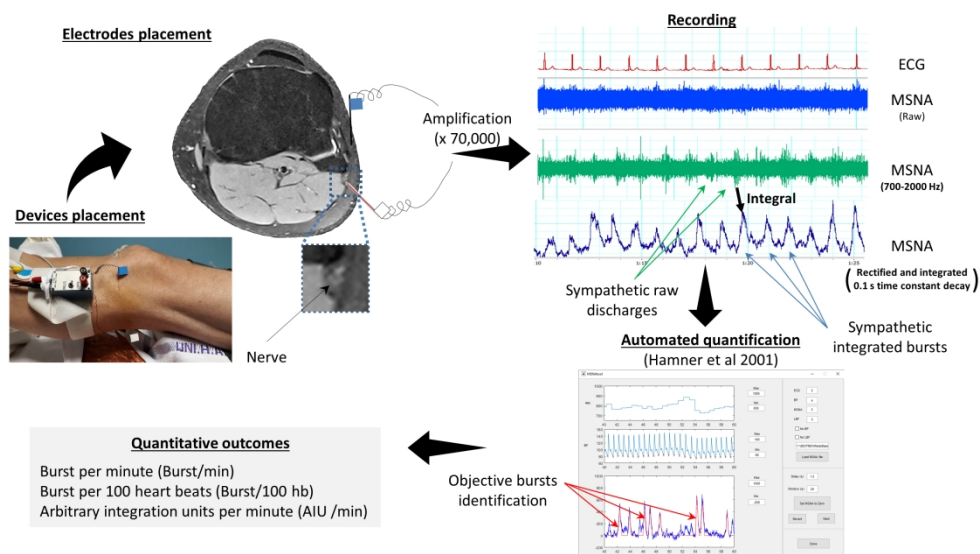

Figure 1. Settings, acquisition, recording and reporting of muscle sympathetic nerve activity (MSNA). Measurement of MSNA is obtained by placement of an un-insulated tungsten register electrode in the peroneal nerve in the popliteal fossae or close to the fibula head. The objective is to reach post ganglionic efferent sympathetic neurons. Potential voltage signal is recorded between the nerve electrode and a reference electrode placed on the external side of the knee. The acquired electrical signal is then amplified, band-filtered (700 to 2000 Hz), rectified and integrated. Sympathetic burst, which correspond to nerve firing, are detected and scored using an automatic software in order to minimize subjective interpretation of the signal MSNA results may be expressed in number of bursts per min or per 100 heart beats, Burst/min and bursts/100 heart beats respectively or using the sum of areas under the curve of all burst in arbitrary integration units per minute or per 100 heart beats, AUI/min and AUI/100 heart beats respectively.

254x142mm (300 x 300 DPI)

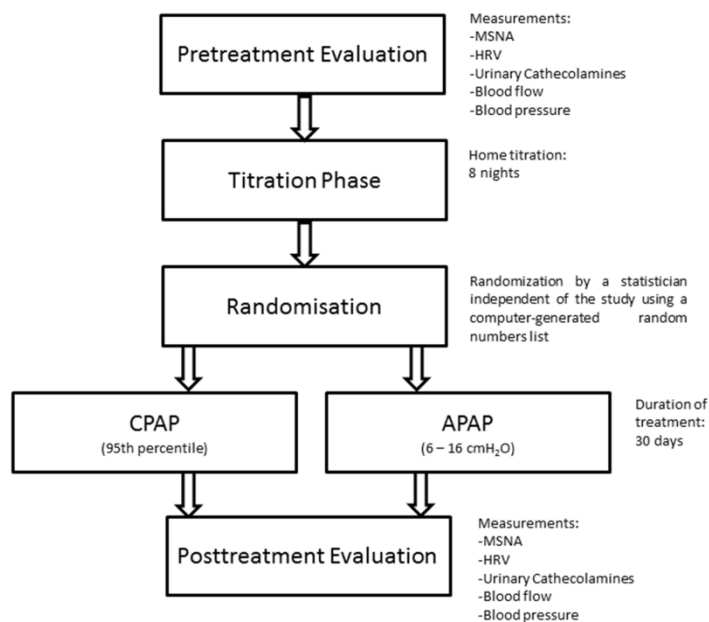

31 Figure 2. Study protocol. MSNA, Muscle Sympathetic Nerve Activity; HRV, heart rate variability; CPAP,  
32 fixed continuous positive pressure; APAP, auto-adjusting continuous positive pressure.

33 254x190mm (300 x 300 DPI)

1  
2  
3  
4  
5  
6 **Supplementary file**  
7

8 Patient consent forms: French and English versions.  
9  
10  
11  
12  
13  
14  
15  
16  
17  
18  
19  
20  
21  
22  
23  
24  
25  
26  
27  
28  
29  
30  
31  
32  
33  
34  
35  
36  
37  
38  
39  
40  
41  
42  
43  
44  
45  
46  
47  
48  
49  
50  
51  
52  
53  
54  
55  
56  
57  
58  
59  
60

For peer review only

**Supplementary material – Consent form (original French version)****FORMULAIRE DE CONSENTEMENT ECLAIRÉ**

**Diminution du tonus sympathique chez les patients avec une apnée obstructive du sommeil: La CPP fixe est-elle plus efficace que la CPP auto ajusté?**

**Titre court : APAP CPAP**

Promoteur de l'étude : CHU de Grenoble – DRCI (Direction de la Recherche Clinique et Innovation) : CHU de Grenoble, CS 10217, 38043 Grenoble Cedex 09 - Tel : 04 76 76 56 09 Fax : 04 76 76 52 21

Investigateur principal : Pr. Renaud Tamisier

Investigateurs du CHU de Grenoble participant à cette étude :

Pr Jean-Louis Pépin, Pr Renaud Tamisier, Pr Patrick Levy, Dr Marie Destors, Dr Erika Treptow, Dr. Holger Whorle: Physiologie Sommeil et Exercice - Pôle Locomotion Rééducation et Physiologie; Dr Cecile Bosc : Centre Santé et Sommeil.

Le Dr .....m'a proposé de participer à l'étude APAP CPAP. Il m'a expliqué en détail les objectifs et le déroulement de celle-ci, ainsi que les bénéfices, les risques et les contraintes.

Une notice d'information m'a été remise et j'ai eu suffisamment de temps pour la lire et prendre la décision d'accepter ou non de participer à l'étude. J'ai pu poser toutes les questions que je souhaitais et j'ai obtenu des réponses satisfaisantes. J'ai bien compris que ma participation à l'étude est volontaire et que je peux à tout moment retirer mon consentement, quelles que soient mes raisons, sans engager ma responsabilité et sans que cela modifie la qualité des soins qui me seront donnés, ni l'attention de mon médecin.



1  
2  
3  
4  
5  
6 J'ai bien pris connaissance que cette recherche sera conduite en conformité avec le  
7 Code de la Santé Publique.  
8  
9

10  
11  
12 J'ai eu l'assurance que les décisions qui s'imposent pour ma santé seront prises à tout  
13 moment, conformément à l'état actuel des connaissances médicales.  
14  
15

16  
17 J'ai compris que je ne dois pas participer à une autre recherche en même temps que  
18 celle-ci.  
19  
20

21  
22  
23  
24 En cours d'étude, tout élément nouveau me concernant et pouvant modifier mon  
25 consentement me sera communiqué.  
26  
27

28  
29  
30  
31 J'accepte que les données de mon dossier médical qui se rapportent à l'étude soient  
32 accessibles aux responsables de l'étude et aux représentants des autorités de santé. A  
33 l'exception de ces personnes, qui traiteront les informations dans le plus strict respect  
34 du secret médical, mon anonymat sera préservé.  
35  
36  
37

38  
39  
40  
41  
42 J'ai pris connaissance que cette recherche a reçu l'avis favorable du Comité de  
43 Protection des Personnes et l'autorisation de l'ANSM le.  
44  
45

46  
47  
48  
49 Le promoteur de la recherche (CHU de Grenoble) a souscrit une assurance de  
50 responsabilité civile en cas de préjudice auprès de la société.  
51  
52

53  
54  
55  
56 J'accepte que les données enregistrées à l'occasion de cette étude fassent l'objet d'un  
57 traitement informatisé par le service de Physiologie Sommeil et Exercice du CHU de  
58 Grenoble, responsable de l'analyse statistique. Je peux accéder, directement ou par  
59  
60

1  
2  
3 l'intermédiaire d'un médecin de mon choix, à l'ensemble de mes données médicales.  
4  
5 Mon droit d'accès, de rectification et d'opposition prévu par la loi " informatique et  
6  
7 libertés " s'exerce à tout moment, auprès du médecin en charge de la recherche.  
8  
9  
10

11  
12 Mon acceptation de participer à l'étude ne dégage pas les médecins et les  
13  
14 organisateurs de l'étude de leur responsabilité. Je conserve tous mes droits garantis  
15  
16 par la loi.  
17

18  
19  
20  
21 J'ai reçu une copie du présent document et j'ai été informé qu'une copie serait  
22  
23 également conservée par l'investigateur et le promoteur dans des conditions  
24  
25 garantissant la confidentialité et j'y consens.  
26

27  
28  
29  
30 Je certifie avoir lu ce document ainsi que la notice d'information et accepte de  
31  
32 participer, librement, à cette recherche, dans les conditions qui m'ont été précisées.  
33

34  
35  
36  
37 En cas d'événements indésirables ou de problèmes, ou si j'ai d'autres questions au  
38  
39 cours de ma participation, je pourrai contacter le médecin en charge de la recherche  
40  
41 au numéro de téléphone suivant : .....  
42  
43  
44

45  
46 Nom / Prénom du patient :

Nom du médecin :

47  
48 .....

.....

49  
50 .....

.....

51  
52  
53 Date : ...../...../.....

Date : ...../...../.....

54  
55  
56 Signature du patient :

Signature du médecin :

1  
2  
3  
4  
5  
6  
7  
8  
9  
10  
11  
12  
13  
14  
15  
16  
17  
18  
19  
20  
21  
22  
23  
24  
25  
26  
27  
28  
29  
30  
31  
32  
33  
34  
35  
36  
37  
38  
39  
40  
41  
42  
43  
44  
45  
46  
47  
48  
49  
50  
51  
52  
53  
54  
55  
56  
57  
58  
59  
60

For peer review only

**Supplementary material – Consent form (English version)****Reduction of Sympathetic tone in OSA patients:****Is CPAP more effective than APAP? – a randomized, parallel clinical trial protocol**

Short title : APAP-CPAP

Study Sponsor: CHU de Grenoble – DRCI (Direction de la Recherche Clinique et Innovation) : CHU de Grenoble, CS 10217, 38043 Grenoble Cedex 09 - Tel : 04 76 76 56 09 Fax : 04 76 76 52 21

Principal investigator: Renaud Tamisier

Members of Grenoble Alpes University Hospital participating in this study :

Pr Jean-Louis Pépin, Pr Renaud Tamisier, Pr Patrick Levy, Dr Marie Destors, Dr Erika Treptow, Dr. Holger Whorle: Physiologie Sommeil et Exercice - Pôle Locomotion Rééducation et Physiologie (Physiology, Sleep and Exercise – Centre for locomotion, Reeducation and Physiology); Dr Cecile Bosc: Centre Santé et Sommeil (Health and SleepCenter).

Dr. ....has proposed that I participate in the study APAP-CPAP study. I have received detailed explanations about the objectives and procedures of the study, as well as its benefits, risks and constraints.

I have received an information sheet and I've had enough time to read it and to make the decision to participate, or not, in the study. I've had the opportunity to ask all my questions and I've received satisfactory answers. I understood that my participation in the study is voluntary and that I can, at any time, withdraw my consent, whatever my reasons, without incurring any responsibility and without any modification in the treatment received.

I have been informed that this study will be conducted according to the French Code of Public Health, and have been assured that all study procedures will be made in

1  
2  
3 accordance with the current medical recommendations.  
4

5 I have understood that I should not participate in any other biomedical research  
6  
7 protocol during the period of this study.  
8

9 During the study, I will be informed of any event concerning my health that could  
10  
11 influence my consent.  
12

13 I accept that the data in my medical file(s) related to the study will be accessible to the  
14  
15 study's collaborators and to representatives of the health authorities. With the  
16  
17 exception of these people, who will deal with my data in respect of professional  
18  
19 secrecy, my anonymity will be preserved.  
20

21 I have been informed that this research has been approved by the Regional Biomedical  
22  
23 Ethics committee (*Comité de Protection de Personnes*) and authorized by the French  
24  
25 National Agency for the Safety of Medicines and Health Products.  
26

27 The sponsor of the study (Grenoble Alpes University Hospital) has contracted an  
28  
29 additional insurance of civil responsibility in case of harms.  
30

31 I accept that the data concerning me acquired during this study will be registered by  
32  
33 the Department of Physiology, Sleep and Exercise of Grenoble Alpes University  
34  
35 Hospital, which is responsible for the statistical analysis. I have the right to access,  
36  
37 directly or through a physician of my choice, the set of information and medical data  
38  
39 concerning me. At any time I will have the right of access and correction of  
40  
41 computerized data according to the law on "*informatique et libertés*" through the  
42  
43 physician responsible for the research.  
44

45 My acceptance to participate in the study does not discharge the organizers and  
46  
47 investigators of the study from their responsibilities. I retain all my rights guaranteed  
48  
49 by law.  
50

51 I have received a copy of the current consent sheet and I was informed that one copy  
52  
53 will be retained by the investigator and another by the sponsor under conditions  
54  
55 guaranteeing confidentiality.  
56

57 I certify that I have read this document as well as the patient information sheet and I  
58  
59 freely accept to participate in the study according to the conditions specified.  
60

In case of any undesirable events or problems, or if I have any other questions during

my participation of the study, I may contact the physician responsible for the research through the telephone number +33 (0)4 76765516.

Surname / First Name of participant :

Surname of investigating physician

in :

.....

.....

.....

.....

Date : ...../...../.....

Date : ...../...../.....

Participant's signature :

Physician's signature :

For peer review only

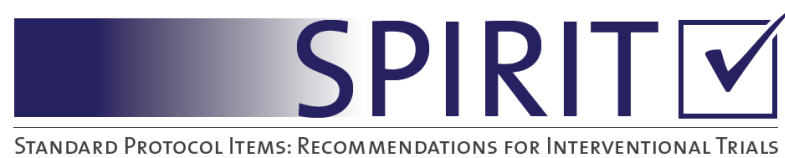

SPIRIT 2013 Checklist: Recommended items to address in a clinical trial protocol and related documents\*

| Section/item                      | Item No | Description                                                                                                                                                                                                                                                                              | Addressed on page number |
|-----------------------------------|---------|------------------------------------------------------------------------------------------------------------------------------------------------------------------------------------------------------------------------------------------------------------------------------------------|--------------------------|
| <b>Administrative information</b> |         |                                                                                                                                                                                                                                                                                          |                          |
| Title                             | 1       | Descriptive title identifying the study design, population, interventions, and, if applicable, trial acronym                                                                                                                                                                             | 1                        |
| Trial registration                | 2a      | Trial identifier and registry name. If not yet registered, name of intended registry                                                                                                                                                                                                     | 3                        |
|                                   | 2b      | All items from the World Health Organization Trial Registration Data Set                                                                                                                                                                                                                 |                          |
| Protocol version                  | 3       | Date and version identifier                                                                                                                                                                                                                                                              |                          |
| Funding                           | 4       | Sources and types of financial, material, and other support                                                                                                                                                                                                                              | 13                       |
| Roles and responsibilities        | 5a      | Names, affiliations, and roles of protocol contributors                                                                                                                                                                                                                                  | 1 and 16                 |
|                                   | 5b      | Name and contact information for the trial sponsor                                                                                                                                                                                                                                       | 1 and 12                 |
|                                   | 5c      | Role of study sponsor and funders, if any, in study design, collection, management, analysis, and interpretation of data, writing of the report; and the decision to submit the report for publication, including whether they will have ultimate authority over any of these activities | 13                       |
|                                   | 5d      | Composition, roles, and responsibilities of the coordinating centre, steering committee, endpoint adjudication committee, data management team, and other individuals or groups overseeing the trial, if applicable (see Item 21a for data monitoring committee)                         | 16                       |

1  
2  
3  
4  
5  
6  
7  
8  
9  
10  
11  
12  
13  
14  
15  
16  
17  
18  
19  
20  
21  
22  
23  
24  
25  
26  
27  
28  
29  
30  
31  
32  
33  
34  
35  
36  
37  
38  
39  
40  
41  
42  
43  
44  
45  
46  
47

## Introduction

|                          |    |                                                                                                                                                                                                           |   |
|--------------------------|----|-----------------------------------------------------------------------------------------------------------------------------------------------------------------------------------------------------------|---|
| Background and rationale | 6a | Description of research question and justification for undertaking the trial, including summary of relevant studies (published and unpublished) examining benefits and harms for each intervention        | 5 |
|                          | 6b | Explanation for choice of comparators                                                                                                                                                                     | 6 |
| Objectives               | 7  | Specific objectives or hypotheses                                                                                                                                                                         | 7 |
| Trial design             | 8  | Description of trial design including type of trial (eg, parallel group, crossover, factorial, single group), allocation ratio, and framework (eg, superiority, equivalence, noninferiority, exploratory) | 7 |

## Methods: Participants, interventions, and outcomes

|                      |     |                                                                                                                                                                                                                                                                                                                                                                                |                                               |
|----------------------|-----|--------------------------------------------------------------------------------------------------------------------------------------------------------------------------------------------------------------------------------------------------------------------------------------------------------------------------------------------------------------------------------|-----------------------------------------------|
| Study setting        | 9   | Description of study settings (eg, community clinic, academic hospital) and list of countries where data will be collected. Reference to where list of study sites can be obtained                                                                                                                                                                                             | 8 and<br>Clinical Trials.gov<br>(NCT03428516) |
| Eligibility criteria | 10  | Inclusion and exclusion criteria for participants. If applicable, eligibility criteria for study centres and individuals who will perform the interventions (eg, surgeons, psychotherapists)                                                                                                                                                                                   | Table 1 and page 8                            |
| Interventions        | 11a | Interventions for each group with sufficient detail to allow replication, including how and when they will be administered                                                                                                                                                                                                                                                     | 8 and 11                                      |
|                      | 11b | Criteria for discontinuing or modifying allocated interventions for a given trial participant (eg, drug dose change in response to harms, participant request, or improving/worsening disease)                                                                                                                                                                                 | NA                                            |
|                      | 11c | Strategies to improve adherence to intervention protocols, and any procedures for monitoring adherence (eg, drug tablet return, laboratory tests)                                                                                                                                                                                                                              | 11                                            |
|                      | 11d | Relevant concomitant care and interventions that are permitted or prohibited during the trial                                                                                                                                                                                                                                                                                  | NA                                            |
| Outcomes             | 12  | Primary, secondary, and other outcomes, including the specific measurement variable (eg, systolic blood pressure), analysis metric (eg, change from baseline, final value, time to event), method of aggregation (eg, median, proportion), and time point for each outcome. Explanation of the clinical relevance of chosen efficacy and harm outcomes is strongly recommended | 8                                             |



|    |                        |    |                                                                                                                                                                                                                                                                                                               |                 |
|----|------------------------|----|---------------------------------------------------------------------------------------------------------------------------------------------------------------------------------------------------------------------------------------------------------------------------------------------------------------|-----------------|
| 1  |                        |    |                                                                                                                                                                                                                                                                                                               |                 |
| 2  |                        |    |                                                                                                                                                                                                                                                                                                               |                 |
| 3  | Parti d part ti mēline | 13 | Time schedule of enr d ment, i r t e r v e n t i o n s (i n d u d n g a n y r u n - i n s a n d w a s h o u t s), a s s e s s m e n t s, a n d v i s i t s f o r p a r t i d p a r t s. A s c h e m a t i c d a g r a m i s h i g h l y r e c o m m e n d e d (s e e F i g u r e)                             | 11 and figure 2 |
| 4  |                        |    |                                                                                                                                                                                                                                                                                                               |                 |
| 5  | Sampl e si ze          | 14 | Esti m a t e d n u m b e r o f p a r t i d p a r t s n e e d e d t o a c h i e v e s t u d y o b j e c t i v e s a n d h o w i t w a s d e t e r m i n e d, i n d u d n g d i r i c t a n d s t a t i s t i c a l a s s u m p t i o n s s u p p o r t i n g a n y s a m p l e s i z e c a l c u l a t i o n s | 11              |
| 6  |                        |    |                                                                                                                                                                                                                                                                                                               |                 |
| 7  |                        |    |                                                                                                                                                                                                                                                                                                               |                 |
| 8  | Recr u i t m e n t     | 15 | S t r a t e g i e s f o r a c h i e v i n g a d e q u a t e p a r t i d p a r t e n r d m e n t t o r e a c h t a r g e t s a m p l e s i z e                                                                                                                                                                 | 11 and 12       |
| 9  |                        |    |                                                                                                                                                                                                                                                                                                               |                 |
| 10 |                        |    |                                                                                                                                                                                                                                                                                                               |                 |

### 11 **Met hods: Assi gnment of i n t e r v e n t i o n s (f o r c o n t r o l l e d t r i a l s)**

#### 12 **Al l o c a t i o n**

|    |                                                            |     |                                                                                                                                                                                                                                                                                                                                                                                                                                                                                                                                                                                                  |             |
|----|------------------------------------------------------------|-----|--------------------------------------------------------------------------------------------------------------------------------------------------------------------------------------------------------------------------------------------------------------------------------------------------------------------------------------------------------------------------------------------------------------------------------------------------------------------------------------------------------------------------------------------------------------------------------------------------|-------------|
| 13 |                                                            |     |                                                                                                                                                                                                                                                                                                                                                                                                                                                                                                                                                                                                  |             |
| 14 |                                                            |     |                                                                                                                                                                                                                                                                                                                                                                                                                                                                                                                                                                                                  |             |
| 15 | Sequence generati on                                       | 16a | Met h o d o f g e n e r a t i n g t h e a l l o c a t i o n s e q u e n c e (e g. c o m p u t e r - g e n e r a t e d r a n d o m n u m b e r s), a n d l i s t o f a n y f a c t o r s f o r s t r a t i f i c a t i o n. T o r e d u c e p r e d i c t a b i l i t y o f a r a n d o m s e q u e n c e, d e t a i l s o f a n y p l a n n e d r e s t r i c t i o n (e g. b l o c k i n g) s h o u l d b e p r o v i d e d i n a s e p a r a t e d o c u m e n t t h a t i s u n a v a i l a b l e t o t h o s e w h o e n r d p a r t i d p a r t s o r a s s i g n i r t e r v e n t i o n s | 12          |
| 16 |                                                            |     |                                                                                                                                                                                                                                                                                                                                                                                                                                                                                                                                                                                                  |             |
| 17 |                                                            |     |                                                                                                                                                                                                                                                                                                                                                                                                                                                                                                                                                                                                  |             |
| 18 |                                                            |     |                                                                                                                                                                                                                                                                                                                                                                                                                                                                                                                                                                                                  |             |
| 19 |                                                            |     |                                                                                                                                                                                                                                                                                                                                                                                                                                                                                                                                                                                                  |             |
| 20 | Al l o c a t i o n c o n c e a l m e n t m e c h a n i s m | 16b | M e c h a n i s m o f i m p l e m e n t i n g t h e a l l o c a t i o n s e q u e n c e (e g. c e n t r a l t e l e p h o n e; s e q u e n t i a l l y n u m b e r e d, o p a q u e, s e a l e d e n v e l o p e s), d e s c r i b i n g a n y s t e p s t o c o n c e a l t h e s e q u e n c e u n t i l i r t e r v e n t i o n s a r e a s s i g n e d                                                                                                                                                                                                                                       | 12          |
| 21 |                                                            |     |                                                                                                                                                                                                                                                                                                                                                                                                                                                                                                                                                                                                  |             |
| 22 |                                                            |     |                                                                                                                                                                                                                                                                                                                                                                                                                                                                                                                                                                                                  |             |
| 23 |                                                            |     |                                                                                                                                                                                                                                                                                                                                                                                                                                                                                                                                                                                                  |             |
| 24 | I m p l e m e n t a t i o n                                | 16c | W h o w i l l g e n e r a t e t h e a l l o c a t i o n s e q u e n c e, w h o w i l l e n r d p a r t i d p a r t s, a n d w h o w i l l a s s i g n p a r t i d p a r t s t o i r t e r v e n t i o n s                                                                                                                                                                                                                                                                                                                                                                                        | 12          |
| 25 |                                                            |     |                                                                                                                                                                                                                                                                                                                                                                                                                                                                                                                                                                                                  |             |
| 26 |                                                            |     |                                                                                                                                                                                                                                                                                                                                                                                                                                                                                                                                                                                                  |             |
| 27 | B i n d i n g ( m a s k i n g)                             | 17a | W h o w i l l b e b i n d e d a f t e r a s s i g n m e n t t o i r t e r v e n t i o n s (e g. t r i a l p a r t i d p a r t s, c a r e p r o v i d e r s, o u t c o m e a s s e s s o r s, d a t a a n a l y s t s), a n d h o w                                                                                                                                                                                                                                                                                                                                                               | 3, 4 and 12 |
| 28 |                                                            |     |                                                                                                                                                                                                                                                                                                                                                                                                                                                                                                                                                                                                  |             |
| 29 |                                                            |     |                                                                                                                                                                                                                                                                                                                                                                                                                                                                                                                                                                                                  |             |
| 30 |                                                            | 17b | I f b i n d e d, c i r c u m s t a n c e s u n d e r w h i c h u n b i n d i n g i s p e r m i s s i b l e, a n d p r o c e d u r e f o r r e v e a l i n g a p a r t i d p a r t ' s a l l o c a t e d i r t e r v e n t i o n d u r i n g t h e t r i a l                                                                                                                                                                                                                                                                                                                                      | NA          |
| 31 |                                                            |     |                                                                                                                                                                                                                                                                                                                                                                                                                                                                                                                                                                                                  |             |
| 32 |                                                            |     |                                                                                                                                                                                                                                                                                                                                                                                                                                                                                                                                                                                                  |             |
| 33 |                                                            |     |                                                                                                                                                                                                                                                                                                                                                                                                                                                                                                                                                                                                  |             |

### 34 **Met hods: Dat a c o l l e c t i o n, m a n a g e m e n t, a n d a n a l y s i s**

|    |                                         |     |                                                                                                                                                                                                                                                                                                                                                                                                                                                                                                                                                                                                                                                                                     |          |
|----|-----------------------------------------|-----|-------------------------------------------------------------------------------------------------------------------------------------------------------------------------------------------------------------------------------------------------------------------------------------------------------------------------------------------------------------------------------------------------------------------------------------------------------------------------------------------------------------------------------------------------------------------------------------------------------------------------------------------------------------------------------------|----------|
| 35 |                                         |     |                                                                                                                                                                                                                                                                                                                                                                                                                                                                                                                                                                                                                                                                                     |          |
| 36 | Dat a c o l l e c t i o n m e t h o d s | 18a | P l a n s f o r a s s e s s m e n t a n d c o l l e c t i o n o f o u t c o m e, b a s e l i n e, a n d o t h e r t r i a l d a t a, i n d u d n g a n y r e l a t e d p r o c e s s e s t o p r o m o t e d a t a q u a l i t y (e g. d u p l i c a t e m e a s u r e m e n t s, t r a i n i n g o f a s s e s s o r s) a n d a d e s c r i p t i o n o f s t u d y i n s t r u m e n t s (e g. q u e s t i o n n a i r e s, l a b o r a t o r y t e s t s) a l o n g w i t h t h e i r r e l i a b i l i t y a n d v a l i d i t y, i f k n o w n. R e f e r e n c e t o w h e r e d a t a c o l l e c t i o n f o r m s c a n b e f o u n d, i f n o t i n t h e p r o t o c o l | 8 and 11 |
| 37 |                                         |     |                                                                                                                                                                                                                                                                                                                                                                                                                                                                                                                                                                                                                                                                                     |          |
| 38 |                                         |     |                                                                                                                                                                                                                                                                                                                                                                                                                                                                                                                                                                                                                                                                                     |          |
| 39 |                                         |     |                                                                                                                                                                                                                                                                                                                                                                                                                                                                                                                                                                                                                                                                                     |          |
| 40 |                                         |     |                                                                                                                                                                                                                                                                                                                                                                                                                                                                                                                                                                                                                                                                                     |          |
| 41 |                                         |     |                                                                                                                                                                                                                                                                                                                                                                                                                                                                                                                                                                                                                                                                                     |          |
| 42 |                                         |     |                                                                                                                                                                                                                                                                                                                                                                                                                                                                                                                                                                                                                                                                                     |          |
| 43 |                                         |     |                                                                                                                                                                                                                                                                                                                                                                                                                                                                                                                                                                                                                                                                                     |          |
| 44 |                                         |     |                                                                                                                                                                                                                                                                                                                                                                                                                                                                                                                                                                                                                                                                                     |          |
| 45 |                                         |     |                                                                                                                                                                                                                                                                                                                                                                                                                                                                                                                                                                                                                                                                                     |          |
| 46 |                                         |     |                                                                                                                                                                                                                                                                                                                                                                                                                                                                                                                                                                                                                                                                                     |          |
| 47 |                                         |     |                                                                                                                                                                                                                                                                                                                                                                                                                                                                                                                                                                                                                                                                                     |          |

1  
2  
3  
4  
5  
6  
7  
8  
9  
10  
11  
12  
13  
14  
15  
16  
17  
18  
19  
20  
21  
22  
23  
24  
25  
26  
27  
28  
29  
30  
31  
32  
33  
34  
35  
36  
37  
38  
39  
40  
41  
42  
43  
44  
45  
46  
47

|                                 |     |                                                                                                                                                                                                                                                                                                                                       |           |
|---------------------------------|-----|---------------------------------------------------------------------------------------------------------------------------------------------------------------------------------------------------------------------------------------------------------------------------------------------------------------------------------------|-----------|
|                                 | 18b | Plans to promote participant retention and complete follow up, including list of any outcome data to be collected for participants who discontinue or deviate from intervention protocols                                                                                                                                             | 12        |
| Data management                 | 19  | Plans for data entry, coding, security, and storage, including any related processes to promote data quality (eg, double data entry; range checks for data values). Reference to where details of data management procedures can be found, if not in the protocol                                                                     | 12        |
| Statistical methods             | 20a | Statistical methods for analysing primary and secondary outcomes. Reference to where other details of the statistical analysis plan can be found, if not in the protocol                                                                                                                                                              | 12 and 13 |
|                                 | 20b | Methods for any additional analyses (eg, subgroup and adjusted analyses)                                                                                                                                                                                                                                                              | NA        |
|                                 | 20c | Definition of analysis population relating to protocol non-adherence (eg, as randomised analyses), and any statistical methods to handle missing data (eg, multiple imputation)                                                                                                                                                       | 12        |
| <b>Methods: Monitoring</b>      |     |                                                                                                                                                                                                                                                                                                                                       |           |
| Data monitoring                 | 21a | Composition of data monitoring committee (DMC); summary of its role and reporting structure; statement of whether it is independent from the sponsor and competing interests; and reference to where further details about its charter can be found, if not in the protocol. Alternatively, an explanation of why a DMC is not needed | no DMC    |
|                                 | 21b | Description of any interim analyses and stopping guidelines, including who will have access to these interim results and make the final decision to terminate the trial                                                                                                                                                               | 11 and 12 |
| Harms                           | 22  | Plans for collecting, assessing, reporting, and managing solicited and spontaneously reported adverse events and other unintended effects of trial interventions or trial conduct                                                                                                                                                     | NA        |
| Auditing                        | 23  | Frequency and procedures for auditing trial conduct, if any, and whether the process will be independent from investigators and the sponsor                                                                                                                                                                                           | 13 and 14 |
| <b>Ethics and dissemination</b> |     |                                                                                                                                                                                                                                                                                                                                       |           |
| Research ethics approval        | 24  | Plans for seeking research ethics committee/institutional review board (REC/IRB) approval                                                                                                                                                                                                                                             | 13        |

|    |                               |     |                                                                                                                                                                                                                                                                                     |                                                                               |
|----|-------------------------------|-----|-------------------------------------------------------------------------------------------------------------------------------------------------------------------------------------------------------------------------------------------------------------------------------------|-------------------------------------------------------------------------------|
| 1  |                               |     |                                                                                                                                                                                                                                                                                     |                                                                               |
| 2  |                               |     |                                                                                                                                                                                                                                                                                     |                                                                               |
| 3  | Protocol amendments           | 25  | Plans for communicating important protocol modifications (eg, changes to eligibility criteria, outcomes, analyses) to relevant parties (eg, investigators, REC/IRBs, trial participants, trial registries, journals, regulators)                                                    | NA                                                                            |
| 4  |                               |     |                                                                                                                                                                                                                                                                                     |                                                                               |
| 5  |                               |     |                                                                                                                                                                                                                                                                                     |                                                                               |
| 6  |                               |     |                                                                                                                                                                                                                                                                                     |                                                                               |
| 7  | Consent or assent             | 26a | Who will obtain informed consent or assent from potential trial participants or authorised surrogates, and how (see Item 32)                                                                                                                                                        | 13 and 17                                                                     |
| 8  |                               |     |                                                                                                                                                                                                                                                                                     |                                                                               |
| 9  |                               |     |                                                                                                                                                                                                                                                                                     |                                                                               |
| 10 |                               | 26b | Additional consent provisions for collection and use of participant data and biological specimens in ancillary studies, if applicable                                                                                                                                               | NA                                                                            |
| 11 |                               |     |                                                                                                                                                                                                                                                                                     |                                                                               |
| 12 | Confidentiality               | 27  | How personal information about potential and enrolled participants will be collected, shared, and maintained in order to protect confidentiality before, during, and after the trial                                                                                                | NA                                                                            |
| 13 |                               |     |                                                                                                                                                                                                                                                                                     |                                                                               |
| 14 |                               |     |                                                                                                                                                                                                                                                                                     |                                                                               |
| 15 |                               |     |                                                                                                                                                                                                                                                                                     |                                                                               |
| 16 | Declaration of interests      | 28  | Financial and other competing interests for principal investigators for the overall trial and each study site                                                                                                                                                                       | 13 and 16                                                                     |
| 17 |                               |     |                                                                                                                                                                                                                                                                                     |                                                                               |
| 18 |                               |     |                                                                                                                                                                                                                                                                                     |                                                                               |
| 19 | Access to data                | 29  | Statement of who will have access to the final trial dataset, and disclosure of contractual agreements that limit such access for investigators                                                                                                                                     | NA                                                                            |
| 20 |                               |     |                                                                                                                                                                                                                                                                                     |                                                                               |
| 21 |                               |     |                                                                                                                                                                                                                                                                                     |                                                                               |
| 22 | Ancillary and post-trial care | 30  | Provisions, if any, for ancillary and post-trial care, and for compensation to those who suffer harm from trial participation                                                                                                                                                       | NA                                                                            |
| 23 |                               |     |                                                                                                                                                                                                                                                                                     |                                                                               |
| 24 |                               |     |                                                                                                                                                                                                                                                                                     |                                                                               |
| 25 | Dissemination policy          | 31a | Plans for investigators and sponsor to communicate trial results to participants, healthcare professionals, the public, and other relevant groups (eg, via publication, reporting in results databases, or other data sharing arrangements), including any publication restrictions | 3 and 13                                                                      |
| 26 |                               |     |                                                                                                                                                                                                                                                                                     |                                                                               |
| 27 |                               |     |                                                                                                                                                                                                                                                                                     |                                                                               |
| 28 |                               |     |                                                                                                                                                                                                                                                                                     |                                                                               |
| 29 |                               | 31b | Authorship eligibility guidelines and any intended use of professional writers                                                                                                                                                                                                      | NA                                                                            |
| 30 |                               |     |                                                                                                                                                                                                                                                                                     |                                                                               |
| 31 |                               | 31c | Plans, if any, for granting public access to the full protocol, participant-level dataset, and statistical code                                                                                                                                                                     | none as yet                                                                   |
| 32 |                               |     |                                                                                                                                                                                                                                                                                     |                                                                               |
| 33 | <b>Appendices</b>             |     |                                                                                                                                                                                                                                                                                     |                                                                               |
| 34 |                               |     |                                                                                                                                                                                                                                                                                     |                                                                               |
| 35 | Informed consent materials    | 32  | Model consent form and other related documentation given to participants and authorised surrogates                                                                                                                                                                                  | Translations from French originals available as supplementary documentation _ |
| 36 |                               |     |                                                                                                                                                                                                                                                                                     |                                                                               |
| 37 |                               |     |                                                                                                                                                                                                                                                                                     |                                                                               |
| 38 |                               |     |                                                                                                                                                                                                                                                                                     |                                                                               |
| 39 |                               |     |                                                                                                                                                                                                                                                                                     |                                                                               |
| 40 |                               |     |                                                                                                                                                                                                                                                                                     |                                                                               |
| 41 |                               |     |                                                                                                                                                                                                                                                                                     |                                                                               |
| 42 |                               |     |                                                                                                                                                                                                                                                                                     |                                                                               |
| 43 |                               |     |                                                                                                                                                                                                                                                                                     |                                                                               |
| 44 |                               |     |                                                                                                                                                                                                                                                                                     |                                                                               |
| 45 |                               |     |                                                                                                                                                                                                                                                                                     |                                                                               |
| 46 |                               |     |                                                                                                                                                                                                                                                                                     |                                                                               |
| 47 |                               |     |                                                                                                                                                                                                                                                                                     |                                                                               |

1  
2  
3  
4  
5  
6  
7  
8  
9  
10  
11  
12  
13  
14  
15  
16  
17  
18  
19  
20  
21  
22  
23  
24  
25  
26  
27  
28  
29  
30  
31  
32  
33  
34  
35  
36  
37  
38  
39  
40  
41  
42  
43  
44  
45  
46  
47

Biological specimens 33 Plans for collection, laboratory evaluation, and storage of biological specimens for genetic or molecular analysis in the current trial and for future use in ancillary studies, if applicable 7 and 10

---

\*It is strongly recommended that this checklist be read in conjunction with the SPIRIT 2013 Explanation & Elaboration for important clarification on the items. Amendments to the protocol should be tracked and dated. The SPIRIT checklist is copyrighted by the SPIRIT Group under the Creative Commons "[Attribution-NonCommercial-NoDerivs 3.0 Unported](#)" license.

For peer review only
