# Supplementary material for: Reduction in sympathetic tone in patients with obstructive sleep apnoea: is fixed CPAP more effective than APAP? A randomised, parallel trial protocol
Source: PubMed Central journal article supplement — BMJ Open. 2019 Apr 4;9(4):e024253. doi: 10.1136/bmjopen-2018-024253 (PMC6500296; doi:10.1136/bmjopen-2018-024253), 2019-04-04
Supplement: bmjopen-2018-024253.reviewer_comments.pdf [file bmjopen-2018-024253.reviewer_comments.pdf]

## PEER REVIEW HISTORY

BMJ Open publishes all reviews undertaken for accepted manuscripts. Reviewers are asked to complete a checklist review form (<http://bmjopen.bmj.com/site/about/resources/checklist.pdf>) and are provided with free text boxes to elaborate on their assessment. These free text comments are reproduced below.

This paper was submitted to a another journal from BMJ but declined for publication following peer review. The authors addressed the reviewers' comments and submitted the revised paper to BMJ Open. The paper was subsequently accepted for publication at BMJ Open.

(This paper received three reviews from its previous journal but only two reviewers agreed to published their review.)

### ARTICLE DETAILS

|                            |                                                                                                                                                    |
|----------------------------|----------------------------------------------------------------------------------------------------------------------------------------------------|
| <b>TITLE (PROVISIONAL)</b> | Reduction in sympathetic tone in Obstructive sleep apnea patients: is fixed CPAP more effective than APAP? – a randomized, parallel trial protocol |
| <b>AUTHORS</b>             | Treptow, Erika; Pepin, Jean Louis; Bailly, Sebastien; Levy, P; Bosc, Cecile; Destors, Marie; Woehrle, Holger; Tamisier, Renaud                     |

### VERSION 1 – REVIEW

|                        |                                                                                                                           |
|------------------------|---------------------------------------------------------------------------------------------------------------------------|
| <b>REVIEWER</b>        | Erik Thunström<br>Inst. Medicine dep. Molecular and Clinical Medicine, Sahlgrenska Academy, Gothenburg University, Sweden |
| <b>REVIEW RETURNED</b> | 17-Jun-2018                                                                                                               |

|                         |                                                                                                                                                                                                                                                                                                                                                                                                                                                                                                                                                                                                                                                                                                                                                                                                                                                                                                                                                                                                                                                                                                                                                                                                                                                               |
|-------------------------|---------------------------------------------------------------------------------------------------------------------------------------------------------------------------------------------------------------------------------------------------------------------------------------------------------------------------------------------------------------------------------------------------------------------------------------------------------------------------------------------------------------------------------------------------------------------------------------------------------------------------------------------------------------------------------------------------------------------------------------------------------------------------------------------------------------------------------------------------------------------------------------------------------------------------------------------------------------------------------------------------------------------------------------------------------------------------------------------------------------------------------------------------------------------------------------------------------------------------------------------------------------|
| <b>GENERAL COMMENTS</b> | <p>This is an interesting study, which will add important knowledge to the field. It is well written and the authors seems to, overall, be coherent with the CONSORT statement for reporting RCT.</p> <p>I have only minor comments:</p> <ol style="list-style-type: none"><li>1. Please specify how you have defined daytime sleepiness (which is an inclusion criterion of the study).</li><li>2. Please specify who will give service to the study participants if they have problems with their CPAP (leakage etc.). Will it be the investigators responsible for the installation of the CPAP, or will it be the blinded investigators responsible for the follow-up and evaluation of the patients.</li><li>3. Which statistical methods will be used to evaluate the difference in the outcome variables: addressed (bursts/min) (independent T-test?), if so please specify. Will there be analyses of differences between base line and follow-up on individual basis (pair T-test) if so please specify this.</li><li>4. In the Sample size section: Why are you only interested in studying an "unilateral situation" which I interpret as one-sided? Would it not be of interest to see if fixed CPAP reduces burst/min less than APAP?</li></ol> |
|-------------------------|---------------------------------------------------------------------------------------------------------------------------------------------------------------------------------------------------------------------------------------------------------------------------------------------------------------------------------------------------------------------------------------------------------------------------------------------------------------------------------------------------------------------------------------------------------------------------------------------------------------------------------------------------------------------------------------------------------------------------------------------------------------------------------------------------------------------------------------------------------------------------------------------------------------------------------------------------------------------------------------------------------------------------------------------------------------------------------------------------------------------------------------------------------------------------------------------------------------------------------------------------------------|

|                        |                                                                              |
|------------------------|------------------------------------------------------------------------------|
| <b>REVIEWER</b>        | Julia Chapman<br>Woolcock Institute of Medical Research/University of Sydney |
| <b>REVIEW RETURNED</b> | 10-Aug-2018                                                                  |

**GENERAL COMMENTS**

Treptow et al have described here a protocol for a randomized, controlled trial which will compare CPAP to APAP on the reduction in sympathetic tone in OSA. This study may be of interest to the sleep community. I have some specific questions regarding the manuscript that I think should be addressed before this protocol can be published. I have outlined them per section below. This protocol would benefit from being checked against the SPIRIT Statement checklist to ensure that all aspects are covered.

**Abstract:**

- The authors should mention that this is a blinded study in the abstract
- There is no mention of sample size in the abstract, this should be included
- Under "Ethics and Dissemination" the Ethics Committee should be specified as later in the manuscript as The French Regional Ethics Committee, rather than just "Ethics Committee"
- The study dates listed here in the abstract should be included later in the manuscript also

**Introduction:**

- It seems incorrect to say that hypertension is a leading cause of death, but it is surely a leading intermediary factor related to cardiovascular death. This should be clarified (it is written better in the abstract)
- Can the authors clarify what is meant by "late cardiovascular events"?
- The introduction focusses primarily on blood pressure. The primary outcome of this protocol is vascular sympathetic tone measured by muscle sympathetic nerve activity microneurography. This technique is not explained at all in the introduction and it needs to be. There should also be an introduction to what is known about MSNA in OSA currently – e.g. how it might be different in OSA compared to controls, and some explanation of why this specific measure was chosen for this study. While there may be no RCTs, are there any observational studies that have looked at the effect of CPAP/APAP on this measurement?
- The aim of the current study is to compare CPAP to APAP, but a clear hypothesis regarding direction of effect should be stated.

**Methods:**

- Similar to the point above – is this study a superiority trial or an equivalence trial? i.e. is CPAP expected to be better than APAP or are they expected to be equal? This has great implications for the sample size calculation and should be described.
- In the "Population" section there should be some justification for the inclusion/exclusion criteria. Including a justification for why the participants need to suffer from daytime sleepiness in order to be included and how this will be evaluated. Are there any exclusion criteria regarding the ability to measure the primary outcome (e.g. nerve conductance disorders)
- Will "consecutive patients be enrolled" or is it more correct to say that "consecutive participants will be invited to participate"? This should be clarified.
- Regarding the MSNA procedure – there is no information regarding the timing of the test. Will it be done during the day/night? How long will it record for to get a bursts/minute recording? Will this be averaged over x minutes etc?
- Regarding the blood pressure procedure – can the authors clarify which arm (dominant/non-dominant/always right or left) the recordings will be taken from? Can the authors provide a reference for the cutoffs for daytime and nighttime hypertension given at the top of page 9?

- Can the authors provide a method for the catecholamine methods they will be using?
  - Under "Procedures" there is a sentence stating that "A minimum of continuous pressure use for 4 hours per night will be required." But there is no statement regarding what happens if this is not met – e.g. will the participant be withdrawn from the study? Will they be given extra time to meet this criteria?
  - Will the CPAP settings include a ramp? Can the authors comment on the potential for unblinding if the patients undergo 8 nights of auto-titration then move to CPAP – will they notice a difference and potentially unblind themselves?
  - Can the authors provide a reference for the choice of APAP pressure range between 6 and 16 cmH<sub>2</sub>O?
  - The sample size calculation should be clarified as much as possible as it is currently unclear. E.g. which program was used to make the calculation and which method/assumptions were used? How did the authors come up with their hypothesis of a reduction of 8 and 5 bursts per minute with CPAP and APAP respectively and the standard deviation of 5? Is there any background data in OSA to suggest this is likely? What are normative values of MSNA bursts? Do the authors anticipate a dropout rate and has this been taken into account in the numbers needed to enroll?
  - The paragraph at the start of Page 11 mentions an interim analysis. It is unclear why this is being done – there appear to be no particular safety concerns to justify this interim analysis as both groups will be receiving treatment for their OSA. There is no discussion about who will perform this analysis. An interim analysis should be conducted by a blinded data safety monitoring committee so as not to impact upon the double-blinded nature of the trial. If this interim analysis is going ahead, it should be justified and it should be made very clear who will be doing this – e.g. a blinded group who will not otherwise be involved in the study?
  - In the "Randomization" section there is mention of blinding, but the allocation concealment is unclear. The unblinded investigator who holds the "list" may be able to influence the order in which patients are enrolled if they know all allocations from a "list". Better would be having the codes in opaque envelopes etc. that are opened at the time of randomization. Can the authors clarify if any attempt has been made to conceal allocation like this?
  - In the statistical methods section can the authors provide a reference for the multiple imputation technique that they plan to use? It is unclear what would happen if there was >20% of missing data. It is also unclear if the analysis aims to assess the difference between the groups in change from baseline, or simply at the end of treatment. This should be clarified in this section.
  - In the "Ethics" section there is mention of the written informed consent – the authors should refer to the appendix here.
- Discussion:
- There are some sections here that should probably be moved/integrated with the introduction – e.g. the discussion about microneurography in the third paragraph of the discussion section.
  - The heading "Conclusions" may be confusing here – without it the final paragraph remains a good summary of the Discussion section.
- Appendix:
- Should the participant information sheets that go along with the consent forms also be included here?
- Figures:
- The legend below Figure 2 on the pdf view that I can see has

|  |                                                                                    |
|--|------------------------------------------------------------------------------------|
|  | some symbols that should not be there – this should be checked before publication. |
|--|------------------------------------------------------------------------------------|

## VERSION 1 – AUTHOR RESPONSE

Reviewer: 1

Reviewer Name: Erik Thunström

Institution and Country: Inst. Medicine and Clinical Medicine,  
Sahlgrenska Academy, Gothenburg University, Sweden

Please state any competing interests or state 'None declared': None Declared

Please leave your comments for the authors below

This is an interesting study, which will add important knowledge to the field. It is well written and the authors seem to, overall, be coherent with the CONSORT statement for reporting RCT.

I have only minor comments:

1. Please specify how you have defined daytime sleepiness (which is an inclusion criterion of the study).

We thank the reviewer for pointing out this lack of accuracy in our protocol description. Daytime sleepiness is defined by an Epworth Sleepiness Scale above 10. The propensity of falling asleep is evaluated in eight different quotidian situations. Answers range from 0 representing no chance of sleeping to 3 signifying high chance of sleep. The final score varies from 0 to 24 and a result superior to 10 represents excessive daytime sleepiness.

We included the cut-off for daytime sleepiness and reference in Page 8.

2. Please specify who will give service to the study participants if they have problems with their CPAP (leakage etc.). Will it be the investigators responsible for the installation of the CPAP, or will it be the blinded investigators responsible for the follow-up and evaluation of the patients. We thank the reviewer for noticing this important point that indeed is crucial for the quality of CPAP treatment. Study participants will have CPAP technical support from their healthcare provider (Agiradom) which provides technical support 24h a day and 7/7 days a week, one phone or if needed directly at patient home. Moreover, this healthcare provider is used to complete this assistance during research trials. The healthcare provider employees are trained in research good clinical practice, and how to maintain the blinding of all occasion to patients and researchers during randomized trials.

We have added this information in Page 11.

3. Which statistical methods will be used to evaluate the difference in the outcome variables: addressed (bursts/minute) (independent T-test?), if so please specify. Will there be analyses of differences between baseline and follow-up on individual basis (pair T-test) if so please specify this.

We thank the reviewer to help us for clarifying the manuscript. The main outcome is analyzed as the difference between both groups (Fixed vs autopiloted). To compare the evolution, we first compute the difference at 1 month vs baseline and we compare this difference value by using a Student t-test for independent groups, according to the normality of the distribution of the difference. If not we will use a non-parametric Mann-Whitney Wilcoxon test. This point has been added into the manuscript in Page

12.

4. In the Sample size section: Why are you only interested in studying an "unilateral situation" which I interpret as one-sided? Would it not be of interest to see if fixed CPAP reduces burst/minute less than APAP?

The reviewer is absolutely right and in our sample calculation we have considered the possibility that both treatments may be superior to the other one. It is the first comparison between these two treatment modalities, so we expect that there are at least equivalent. Therefore, instead of the initial submission, the term unilateral has been modified by bilateral.

Reviewer: 2

Reviewer Name: Julia Chapman

Institution and Country: Woolcock Institute of Medical Research/University of Sydney

Please state any competing interests or state 'None declared': None declared

Please leave your comments for the authors below

Treptow et al have described here a protocol for a randomized, controlled trial which will compare CPAP to APAP on the reduction in sympathetic tone in OSA. This study may be of interest to the sleep community. I have some specific questions regarding the manuscript that I think should be addressed before this protocol can be published. I have outlined them per section below. This protocol would benefit from being checked against the SPIRIT Statement checklist to ensure that all aspects are covered.

Abstract:

- The authors should mention that this is a blinded study in the abstract - There is no mention of sample size in the abstract, this should be included

As suggested by the reviewer these have been added in the abstract section.

- Under "Ethics and Dissemination" the Ethics Committee should be specified as later in the manuscript as The French Regional Ethics Committee, rather than just "Ethics Committee"

The correction was made in the abstract. Page 3.

- The study dates listed here in the abstract should be included later in the manuscript also

The study chronogram was included in Page 13.

Introduction:

- It seems incorrect to say that hypertension is a leading cause of death, but it is surely a leading intermediate factor related to cardiovascular death. This should be clarified (it is written better in the abstract)

We are thankful for this suggestion. The revised statement was added to the introduction Page 5 as follows: "Hypertension is the main intermediate mechanism implicated in cardiovascular risk".

- Can the authors clarify what is meant by "late cardiovascular events"?

We acknowledge that this terminology is at least not enough accurate, and we thank the reviewer for pointing this. Sleep Apnea is associated with cardiovascular activation including sympathetic overactivity, which favors vascular damage and hypertension leading to peripheral and coronary atherosclerosis and myocardial alteration. These may be involved in the pathogenicity of many cardiovascular outcomes as cardiac arrhythmias, ischemic and non-ischemic cardiomyopathies at the heart level and aortic aneurysms and cerebrovascular accidents at vascular level. The incidence and progression of these diseases may take years to develop and are defined as late cardiovascular events or long-term cardiovascular adverse events or outcomes. We substituted the term "late cardiovascular events" to "long-term cardiovascular outcomes" Page 5.

- The introduction focusses primarily on blood pressure. The primary outcome of this protocol is vascular sympathetic tone measured by muscle sympathetic nerve activity microneurography. This technique is not explained at all in the introduction and it needs to be. There should also be an introduction to what is known about MSNA in OSA currently – e.g. how it might be different in OSA compared to controls, and some explanation of why this specific measure was chosen for this study. While there may be no RCTs, are there any observational studies that have looked at the effect of CPAP/APAP on this measurement?

This is a very important remark made by the reviewer. We included the following paragraphs in the introduction describing the importance of the MSNA method for the understanding of the pathophysiology of systemic arterial hypertension and its sense in obstructive sleep apnea and added the adequate references:

“Muscle sympathetic nerve activity (MSNA) is one of the reference methods for measuring sympathetic activity and understanding the pathophysiology of neurogenic hypertension (18). Moreover, MSNA changes across time or after interventions are corresponding with arterial blood pressure changes in prehypertension (19).

In different models of hypertension only intermittent hypoxia, which is the main stimulus in OSA, causes neurogenesis modulation in hippocampus (20). In human, intermittent hypoxic exposure induces after 2 and 4 weeks an increase in daytime MSNA (13, 17). This increase in sympathetic tone was suggested in the early 90s as a mechanism of hypertension in OSA (16, 21). Therefore, MSNA measurement is of particular interest in showing the effect of OSA treatment as a surrogate marker of cardiovascular outcomes. Although several studies have demonstrated the beneficial effects of OSA treatment by continuous positive airway pressure (CPAP) in sympathetic activation (14, 22-24), this measurement has never been evaluated in patients under Auto-adjusting continuous pressure (APAP). MSNA consists of a technique of microneurography minimally invasive that measures the sympathetic nerve activity of the peroneal nerve.”

- The aim of the current study is to compare CPAP to APAP, but a clear hypothesis regarding direction of effect should be stated.

As it was specified in the response to the Reviewer one, in the submitted manuscript we formulated an a priori assumption of superiority of APAP vs CPAP owing to our previous publication in Thorax journal. However, we agree with both reviewers that we do not have yet data supporting this assumption, and this has been changed throughout the manuscript. Since we based our hypothesis on a difference between the two PAP modalities on a delta change this reformulation of our hypothesis does not change the sample size calculation. Hence the assumption is bilateral and not unilateral, and therefore the aim of the study is to compare both treatment modalities without any a priori. This was modified in the document.

Methods:

- Similar to the point above – is this study a superiority trial or an equivalence trial? i.e. is CPAP expected to be better than APAP or are they expected to be equal? This has great implications for the sample size calculation and should be described.

The reviewer is right, we have been not enough precise in our manuscript. As stated above, the sample size calculation was based on a bilateral assumption and not an unilateral assumption.

- In the “Population” section there should be some justification for the inclusion/exclusion criteria. Including a justification for why the participants need to suffer from daytime sleepiness in order to be included and how this will be evaluated. Are there any exclusion criteria regarding the ability to measure the primary outcome (e.g. nerve conductance disorders)

We thank the reviewer for this comment, that is actually related with the French health authority rules. Indeed, patients should complain of subjective daytime sleepiness in order to be eligible for CPAP treatment.

There are indeed no exclusion criteria per se regarding the measurement of the primary outcome. The PI has investigated MSNA in more than 500 patients in different populations (heart failure, metabolic syndrome, restless leg syndrome, elderly patients). These are not “exclusion criteria” they are only more technically difficult patients with a higher rate of technical failure. These technical failures have been taken into account in our sample size calculation.

- Will “consecutive patients be enrolled” or is it more correct to say that “consecutive participants will be invited to participate”? This should be clarified.  
Again, we thank the reviewer for helping us in clarifying our manuscript; the sentence was changed as suggested (Page 8).

- Regarding the MSNA procedure – there is no information regarding the timing of the test. Will it be done during the day/night? How long will it record for to get a bursts/ minute recording? Will this be averaged over x minutes etc?

We thank the reviewer for this comment and we included the following statement concerning MSNA description and timing:

“ We will obtain Muscle Sympathetic Nerve Activity ( MSNA) from nerve recordings using standard tungsten microelectrodes inserted into the peroneal nerve into the popliteal area, after localization by electric surface stimulation (Figure 1). Signals will be filtered (700-2000 Hz), amplified (x70,000) and full-wave rectified. The rectified signal will be integrated (0.1 second moving window) for display and for recording ( Nerve Traffic Analyzer, Model 662c-3, University of Iowa, Biomedical Engineering Dept., Iowa City, IA). Electrode position in muscle fascicles will be confirmed by pulse synchronous bursts of activity occurring 1.2-1.4 s after the ECG QRS complex, reproducible activation during the second phase of the Valsalva maneuver, elicitation of afferent nerve activity by mild muscle stretching and the absence of response to startle. Doppler popliteal vascular flows ( DWL500EZ) will be measured during time periods concomitant from measurement of MSNA, HR (3-lead ECG) and arterial blood pressure. Beat-by-beat arterial BP for vascular doppler leg resistance calculations will be measured using the CNAP® system the same time periods. All these signals will be digitized and recorded for off-line analysis on Powerlab system. These measurements will be performed before and after PAP therapy on morning sessions, fasted since 12 AM from foods and any beverage except water, during room air breathing. We will average nerve activity, heart rate and arterial blood pressure over 5-minute windows of data collection at baseline and post-PAP therapy. Sympathetic bursts will be identified using a specific algorithm described by Hamner and colleagues (50) using Matlab software (The Mathworks Inc., Natick, MA USA). For purposes of quantification MSNA will be reported in at least five minute periods and expressed as burst frequency (bursts/ minute and bursts/100 heart beats).”

- Regarding the blood pressure procedure – can the authors clarify which arm (dominant/non-dominant/always right or left) the recordings will be taken from? Can the authors provide a reference for the cutoffs for daytime and nighttime hypertension given at the top of page 9? We thank the reviewer for asking precision about these points.

Regarding the reference of the cutoffs, this is written in our manuscript: Daytime hypertension is defined as daytime SBP > 135 mmHg and/or DBP > 85 mmHg, and nighttime hypertension as SBP > 120 mmHg and/or DBP > 70 mmHg.

The last reference of the 2018 ESC/ESH guidelines has been added in our manuscript.

Regarding the method for ambulatory blood pressure measurement the following sentence has been added: “Ambulatory blood pressure will be measured in the dominant arm over 24 hours at 15 minute intervals during daytime and every 30 minutes nighttime (ABP monitor 90207, Spacelabs Healthcare, Issaquah WA). Blood pressure acquisition began at a morning session and ended 24 hours later.”

- Can the authors provide a method for the catecholamine methods they will be using? The method used to measure catecholamines will be high-performance liquid chromatography with electrochemical detection as described as following in the paper: Catecholamines (epinephrine, norepinephrine, and dopamine) will be measured by high-performance liquid chromatography with electrochemical detection (Coul array Detector, ESA Dionex, Chelmsford, USA).

- Under "Procedures" there is a sentence stating that "A minimum of continuous pressure use for 4 hours per night will be required." But there is no statement regarding what happens if this is not met – e.g. will the participant be withdrawn from the study? Will they be given extra time to meet this criteria?

Participants with lower usage hours than 4 hours per night during titration phase will not be included in randomization. A statement concerning this criterion was added in Page 11.

- Will the CPAP settings include a ramp? Can the authors comment on the potential for unblinding if the patients undergo 8 nights of auto-titration then move to CPAP – will they notice a difference and potentially unblind themselves?

The reviewer is right that the patient even with a ramp may experience a difference between CPAP and the 8 nights of auto-titration using APAP during the run-in period. This is why we will select patients who are naïve from PAP treatment and during protocol presentation to the patient, it will be said that we will test two different treatment modalities without saying any superiority from one to the other one. To all patients it will be said that after a run-in period, their PAP therapy will be set following the arm they will be randomized in and this will change the experience on PAP compared to the run-in period. We will pay attention not to say in one arm continuous and one arm auto-adjusted. Moreover, we have trained the healthcare provider technicians who will be in charge of setting the PAP therapy not to say anything regarding the setting to the patient. Even though we acknowledge that patients will experience differences on the different arms, we believe that our procedures will maintain sufficient blinding from the patients in order not to alter their response to treatment comparably.

- Can the authors provide a reference for the choice of APAP pressure range between 6 and 16 cmH<sub>2</sub>O?

We will use the same methodology as previous trial in our research see Pepin et al [Pepin Thorax 2016]

- The sample size calculation should be clarified as much as possible as it is currently unclear. E.g. which program was used to make the calculation and which method/assumptions were used? How did the authors come up with their hypothesis of a reduction of 8 and 5 bursts per minute with CPAP and APAP respectively and the standard deviation of 5? Is there any background data in OSA to suggest this is likely? What are normative values of MSNA bursts? Do the authors anticipate a dropout rate and has this been taken into account in the numbers needed to enroll? We thank the reviewer to maintain our attention in providing as much as possible a good readiness of the methodology. For all statistical analysis, we are using the program: Proc Power of SAS v9.4.

In order to improve clarity, a new formulation of the assumptions are specified in the text as follows Page 11: "We hypothesized the impact of PAP therapy to be 8±5 bursts/minute in one arm group and 5±5 bursts/minute in the other arm with no a priori assumption group. Assuming an alpha error of 5%, a statistical power of 80%, in bilateral situation, 34 patients per arm will need to be enrolled in the study."

The following sentence has been added into the manuscript: "In the sample size, we anticipate that 10% will not meet the criteria of compliance to pressure support after 1 week, and 10% more will drop out before termination of the study."



Regarding the change in MSNA as we previously mentioned, there is no data on effect of different PAP modalities on MSNA change across time. Herein, we used the change that has been demonstrated by Narkiewicz et al [Narkiewicz et al Nocturnal Continuous Positive Airway Pressure Decreases Daytime Sympathetic Traffic in Obstructive Sleep Apnea Circulation 1999], and that we have found using the same methodology in a previous set of patients published in 2015 [Tami et al Sleep 2015]. It is important to note that in this paper we reported MSNA using a different methodology. Using the burst count MSNA went from  $40.49 \pm 5.63$  to  $35.47 \pm 4.06$  burst/min after 6 months of CPAP.

We indeed anticipate a drop-out rate of 20% due to the inability to obtain MSNA recordings in the two measurements, drop out and do not meet the compliance criteria after one week running period. The following sentence has been added in the methodology section on page 11: "In the sample size, we anticipate that 10% will not meet the criteria of compliance to pressure support after 1 week, and 10% more will drop out before termination of the study."

- The paragraph at the start of Page 11 mentions an interim analysis. It is unclear why this is being done – there appear to be no particular safety concerns to justify this interim analysis as both groups will be receiving treatment for their OSA. There is no discussion about who will perform this analysis. An interim analysis should be conducted by a blinded data safety monitoring committee so as not to impact upon the double-blinded nature of the trial. If this interim analysis is going ahead, it should be justified and it should be made very clear who will be doing this – e.g. a blinded group who will not otherwise be involved in the study?

The reviewer is right there are no safety concerns and herein the interim analysis is not about safety concern but rather about the feasibility of the study. As we previously mentioned in the present manuscript, although if present a difference in sympathetic inhibition between PAP modalities is a very important fact for clinicians and researcher, there is no previous data on this. Hence, we set our study to serve as preliminary data and if at interim analysis we confirm difference trend then it will argue for completing the whole sample size. The sentence was modified as follows: "Because it is a pilot study, we will perform..."

The interim analysis will be performed by an independent statistician who has no connection with the study. The interim analysis does not need to be performed by a data safety monitoring committee since there is not safety issue. The statistician will have not been involved in the study and is part of an independent data center in our university hospital. The following sentence has been added in the method: "This interim analysis will be performed by a blinded statistical which have no regard on the randomization list neither contacts with the investigator nor involvement in the study."

- In the "Randomization" section there is mention of blinding, but the allocation concealment is unclear. The unblinded investigator who holds the "list" may be able to influence the order in which patients are enrolled if they know all allocations from a "list". Better would be having the codes in opaque envelopes etc. that are opened at the time of randomization. Can the authors clarify if any attempt has been made to conceal allocations like this?

The reviewer is right the people holding the randomization list should not be an investigator and actually they are not since two independent persons are holding the randomization list (in case of absence). The randomization list was issued from the Clinical Research Direction from our university hospital which is not involved in the conduct of the trial. To this extent we do not need to use codes in opaque envelopes. This procedure was set by the research department of Grenoble Alpes University hospital in order to provide randomization quality to investigators. The following sentence has been added in page 12: "Randomization list was provided by the clinical research department of Grenoble Alpes university hospital and the randomization list is held and followed by two independent persons from the study. These persons provide allocation directly to the healthcare provider maintaining blinding of the patient and the investigators."

- In the statistical methods section can the authors provide a reference for the multiple imputation technique that they plan to use? It is unclear what would happen if there was >20% of missing data. It is also unclear if the analysis aims to assess the difference between the groups in change from baseline, or simply at the end of treatment. This should be clarified in this section. The following sentences have been added into the manuscript:

- by using MC-M chains for qualitative variables or full conditional specification for quantitative variables.
- "Variables with more than 20% of missing values will not be taken into account."

- In the "Ethics" section there is mention of the written informed consent – the authors should refer to the appendix here.

A reference to the supplementary file was added in the Ethics section Page13.

Discussion:

- There are some sections here that should probably be moved/integrated with the introduction – e.g. the discussion about microneurography in the third paragraph of the discussion section. We thank the reviewer for this suggestion, however since we added a completely new section on MSNA technique and significance in the introduction, we believe that this section may stay in the discussion. However, if this section remains an issue for the reviewer, we may remove it from the discussion.

- The heading "Conclusions" may be confusing here – without it the final paragraph remains a good summary of the Discussion section.

The heading Conclusions was removed as suggested.

Appendix:

- Should the participant information sheets that go along with the consent forms also be included here?

We believe that the consent form provides the necessary information for the supplementary file.

Figures:

- The legend below Figure 2 on the pdf view that I can see has some symbols that should not be there – this should be checked before publication.

We checked the legend below Figure 2 and made the necessary corrections.

#### VERSION 2 – REVIEW

|                        |                                                                                 |
|------------------------|---------------------------------------------------------------------------------|
| <b>REVIEWER</b>        | Erik Thunström<br>Inst. of Medicine, Sahlgrenska Academy, Gothenburg University |
| <b>REVIEW RETURNED</b> | 17-Nov-2018                                                                     |

|                         |                                                                     |
|-------------------------|---------------------------------------------------------------------|
| <b>GENERAL COMMENTS</b> | It is an interesting study, looking forward to reading the results. |
|-------------------------|---------------------------------------------------------------------|
