# Supplementary material for: Reduction in sympathetic tone in patients with obstructive sleep apnoea: is fixed CPAP more effective than APAP? A randomised, parallel trial protocol
Source: PubMed Central journal article supplement — BMJ Open. 2019 Apr 4;9(4):e024253. doi: 10.1136/bmjopen-2018-024253 (PMC6500296; doi:10.1136/bmjopen-2018-024253), 2019-04-04
Supplement: bmjopen-2018-024253supp001.pdf [file bmjopen-2018-024253supp001.pdf]

**Supplementary file**

Patient consent forms: French and English versions.

**Supplementary material – Consent form (original French version)**

**FORMULAIRE DE CONSENTEMENT ECLAIRÉ**

**Diminution du tonus sympathique chez les patients avec une apnée obstructive du sommeil: La CPP fixe est-elle plus efficace que la CPP auto ajusté?**

**Titre court : APAP CPAP**

Promoteur de l'étude : CHU de Grenoble – DRCI (Direction de la Recherche Clinique et Innovation) : CHU de Grenoble, CS 10217, 38043 Grenoble Cedex 09 - Tel : 04 76 76 56 09 Fax : 04 76 76 52 21

Investigateur principal : Pr. Renaud Tamisier

Investigateurs du CHU de Grenoble participant à cette étude :

Pr Jean-Louis Pépin, Pr Renaud Tamisier, Pr Patrick Levy, Dr Marie Destors, Dr Erika Treptow, Dr. Holger Whorle: Physiologie Sommeil et Exercice - Pôle Locomotion Rééducation et Physiologie; Dr Cecile Bosc : Centre Santé et Sommeil.

Le Dr .....m'a proposé de participer à l'étude APAP CPAP. Il m'a expliqué en détail les objectifs et le déroulement de celle-ci, ainsi que les bénéfices, les risques et les contraintes.

Une notice d'information m'a été remise et j'ai eu suffisamment de temps pour la lire et prendre la décision d'accepter ou non de participer à l'étude. J'ai pu poser toutes les questions que je souhaitais et j'ai obtenu des réponses satisfaisantes. J'ai bien compris que ma participation à l'étude est volontaire et que je peux à tout moment retirer mon consentement, quelles que soient mes raisons, sans engager ma responsabilité et sans que cela modifie la qualité des soins qui me seront donnés, ni l'attention de mon médecin.

J'ai bien pris connaissance que cette recherche sera conduite en conformité avec le Code de la Santé Publique.

J'ai eu l'assurance que les décisions qui s'imposent pour ma santé seront prises à tout moment, conformément à l'état actuel des connaissances médicales.

J'ai compris que je ne dois pas participer à une autre recherche en même temps que celle-ci.

En cours d'étude, tout élément nouveau me concernant et pouvant modifier mon consentement me sera communiqué.

J'accepte que les données de mon dossier médical qui se rapportent à l'étude soient accessibles aux responsables de l'étude et aux représentants des autorités de santé. A l'exception de ces personnes, qui traiteront les informations dans le plus strict respect du secret médical, mon anonymat sera préservé.

J'ai pris connaissance que cette recherche a reçu l'avis favorable du Comité de Protection des Personnes et l'autorisation de l'ANSM le.

Le promoteur de la recherche (CHU de Grenoble) a souscrit une assurance de responsabilité civile en cas de préjudice auprès de la société.

J'accepte que les données enregistrées à l'occasion de cette étude fassent l'objet d'un traitement informatisé par le service de Physiologie Sommeil et Exercice du CHU de Grenoble, responsable de l'analyse statistique. Je peux accéder, directement ou par

l'intermédiaire d'un médecin de mon choix, à l'ensemble de mes données médicales. Mon droit d'accès, de rectification et d'opposition prévu par la loi " informatique et libertés " s'exerce à tout moment, auprès du médecin en charge de la recherche.

Mon acceptation de participer à l'étude ne dégage pas les médecins et les organisateurs de l'étude de leur responsabilité. Je conserve tous mes droits garantis par la loi.

J'ai reçu une copie du présent document et j'ai été informé qu'une copie serait également conservée par l'investigateur et le promoteur dans des conditions garantissant la confidentialité et j'y consens.

Je certifie avoir lu ce document ainsi que la notice d'information et accepte de participer, librement, à cette recherche, dans les conditions qui m'ont été précisées.

En cas d'événements indésirables ou de problèmes, ou si j'ai d'autres questions au cours de ma participation, je pourrai contacter le médecin en charge de la recherche au numéro de téléphone suivant : .....

Nom / Prénom du patient :

.....

.....

Date : ...../...../.....

Signature du patient :

Nom du médecin :

.....

.....

Date : ...../...../.....

Signature du médecin :



**Supplementary material – Consent form (English version)**

**Reduction of Sympathetic tone in OSA patients:**

**Is CPAP more effective than APAP? – a randomized, parallel clinical trial protocol**

Short title : APAP-CPAP

Study Sponsor: CHU de Grenoble – DRCI (Direction de la Recherche Clinique et Innovation) : CHU de Grenoble, CS 10217, 38043 Grenoble Cedex 09 - Tel : 04 76 76 56 09 Fax : 04 76 76 52 21

Principal investigator: Renaud Tamisier

Members of Grenoble Alpes University Hospital participating in this study :

Pr Jean-Louis Pépin, Pr Renaud Tamisier, Pr Patrick Levy, Dr Marie Destors, Dr Erika Treptow, Dr. Holger Whorle: Physiologie Sommeil et Exercice - Pôle Locomotion Rééducation et Physiologie (Physiology, Sleep and Exercise – Centre for locomotion, Reeducation and Physiology); Dr Cecile Bosc: Centre Santé et Sommeil (Health and SleepCenter).

Dr. ....has proposed that I participate in the study APAP-CPAP study. I have received detailed explanations about the objectives and procedures of the study, as well as its benefits, risks and constraints.

I have received an information sheet and I've had enough time to read it and to make the decision to participate, or not, in the study. I've had the opportunity to ask all my questions and I've received satisfactory answers. I understood that my participation in the study is voluntary and that I can, at any time, withdraw my consent, whatever my reasons, without incurring any responsibility and without any modification in the treatment received.

I have been informed that this study will be conducted according to the French Code of Public Health, and have been assured that all study procedures will be made in

accordance with the current medical recommendations.

I have understood that I should not participate in any other biomedical research protocol during the period of this study.

During the study, I will be informed of any event concerning my health that could influence my consent.

I accept that the data in my medical file(s) related to the study will be accessible to the study's collaborators and to representatives of the health authorities. With the exception of these people, who will deal with my data in respect of professional secrecy, my anonymity will be preserved.

I have been informed that this research has been approved by the Regional Biomedical Ethics committee (*Comité de Protection de Personnes*) and authorized by the French National Agency for the Safety of Medicines and Health Products.

The sponsor of the study (Grenoble Alpes University Hospital) has contracted an additional insurance of civil responsibility in case of harms.

I accept that the data concerning me acquired during this study will be registered by the Department of Physiology, Sleep and Exercise of Grenoble Alpes University Hospital, which is responsible for the statistical analysis. I have the right to access, directly or through a physician of my choice, the set of information and medical data concerning me. At any time I will have the right of access and correction of computerized data according to the law on "*informatique et libertés*" through the physician responsible for the research.

My acceptance to participate in the study does not discharge the organizers and investigators of the study from their responsibilities. I retain all my rights guaranteed by law.

I have received a copy of the current consent sheet and I was informed that one copy will be retained by the investigator and another by the sponsor under conditions guaranteeing confidentiality.

I certify that I have read this document as well as the patient information sheet and I freely accept to participate in the study according to the conditions specified.

In case of any undesirable events or problems, or if I have any other questions during

my participation of the study, I may contact the physician responsible for the research through the telephone number +33 (0)4 76765516.

Surname / First Name of participant :

Surname of investigating physician

in :

.....

.....

.....

.....

Date : ...../...../.....

Date : ...../...../.....

Participant's signature :

Physician's signature :
